# Supplementary material for: Predominance of methanogens over methanotrophs contributes to high methane emissions in rewetted fens
Source: Copernicus journal article supplement (doi:10.5194/bg-2018-184), 2018-04-26
Supplement: Supplementary file [file bg-2018-184-RC2-supplement.pdf]

# 1 **Predominance of methanogens over methanotrophs contributes** 2 **to high methane emissions in rewetted fens**

3 Xi Wen<sup>1\*</sup>, Viktoria Unger<sup>2\*</sup>, Gerald Jurasinski<sup>2</sup>, Franziska Koebsch<sup>2</sup>, Fabian Horn<sup>1</sup>, Gregor  
4 Rehder<sup>3</sup>, Torsten Sachs<sup>4</sup>, Dominik Zak<sup>5,6</sup>, Gunnar Lischeid<sup>7,8</sup>, Klaus-Holger Knorr<sup>9</sup>, Michael  
5 Böttcher<sup>10</sup>, Matthias Winkel<sup>1</sup>, and Susanne Liebner<sup>1,11</sup>.

6 <sup>1</sup>Section 5.3 Geomicrobiology, GFZ German Research Centre for Geosciences, Helmholtz Centre  
7 Potsdam, Telegrafenberg, Potsdam, 14473, Germany

8 <sup>2</sup>Landscape Ecology and Site Evaluation, Faculty for Agricultural and Environmental Sciences,  
9 Rostock University, Rostock, 18059, Germany

10 <sup>3</sup>Department of Marine Chemistry, Leibniz Institute for Baltic Sea Research, Warnemünde, 18119,  
11 Germany

12 <sup>4</sup>Section 1.4 Remote Sensing, GFZ German Research Centre for Geosciences, Helmholtz Centre  
13 Potsdam, Telegrafenberg, Potsdam, 14473, Germany

14 <sup>5</sup>Department of Bioscience, Aarhus University, Silkeborg, 8600, Denmark

15 <sup>6</sup>Department of Chemical Analytics and Biogeochemistry, Leibniz Institute of Freshwater Ecology  
16 and Inland Fisheries, Berlin, 12587, Germany

17 <sup>7</sup>Institute of Landscape Hydrology, Leibniz Center for Agricultural Landscape Research,  
18 Münchberg, 15374, Germany

19 <sup>8</sup>Institute of Earth and Environmental Science, University of Potsdam, Potsdam, 14476, Germany

20 <sup>9</sup>Institute of Landscape Ecology, University of Münster, Münster, 48149, Germany

21 <sup>10</sup>Geochemistry and Stable Isotope Biogeochemistry, Leibniz Institute for Baltic Sea Research,  
22 Warnemünde, 18119, Germany

23 <sup>11</sup>University of Potsdam, Institute of Biochemistry and Biology, Potsdam, 14469, Germany

24 *Correspondence to:* Viktoria Unger ([viktoria.unger@uni-rostock.de](mailto:viktoria.unger@uni-rostock.de)), Franziska Koebsch  
25 ([franziska.koebsch@uni-rostock.de](mailto:franziska.koebsch@uni-rostock.de))

26 \*Shared first authorship – the two first authors contributed equally to preparation of this work

27 **Abstract.** The rewetting of drained peatlands alters peat geochemistry and often leads to sustained  
28 elevated methane emission. Although this methane is produced entirely by microbial activity, the  
29 distribution and abundance of methane-cycling microbes in rewetted peatlands, especially in fens,  
30 is rarely described. In this study, we compare the community composition and abundance of  
31 methane-cycling microbes in relation to peat porewater geochemistry in two rewetted fens in  
32 northeastern Germany, a coastal brackish fen and a freshwater riparian fen, with known high  
33 methane fluxes. We utilized 16S rDNA high-throughput sequencing and quantitative polymerase

34 chain reaction on 16S rDNA, *mcrA*, and *pmoA* genes to determine microbial community  
35 composition and the abundance of total bacteria, methanogens, and methanotrophs. Electrical  
36 conductivity was more than three times higher in the coastal fen than in the riparian fen, averaging  
37 5.3 and 1.5 mS cm<sup>-1</sup>, respectively. Porewater concentrations of terminal electron acceptors varied  
38 within and among the fens. This was also reflected in similarly high intra- and inter-site variations  
39 of microbial community composition. Despite these differences in environmental conditions and  
40 electron acceptor availability, we found a low abundance of methanotrophs and a high abundance  
41 of methanogens, represented in particular by *Methanosaetaceae*, in both fens. This suggests that  
42 rapid re/establishment of methanogens and slow re/establishment of methanotrophs contributes to  
43 prolonged increased methane emissions following rewetting.

## 44 **1 Introduction**

45 Rewetting is a technique commonly employed to restore ecological and biogeochemical  
46 functioning of drained fens. However, while rewetting may reduce carbon dioxide (CO<sub>2</sub>) emissions  
47 (Wilson et al. 2016), it often increases methane (CH<sub>4</sub>) emissions in peatlands that remain mostly  
48 inundated following rewetting. The factors that contribute to the magnitude and duration of this  
49 increase are still uncertain (Joosten et al. 2015, Abdalla et al. 2016). On a 100-year time scale CH<sub>4</sub>  
50 has a global warming potential 28 times stronger than CO<sub>2</sub> (Myhre et al. 2013); thus, increased  
51 CH<sub>4</sub> emissions could potentially offset the benefit of decreased CO<sub>2</sub> emissions (Jurassinski et al.  
52 2016). Although a recent increase in rewetting projects in Germany and other European nations  
53 has prompted a number of studies of methane cycling in rewetted peatlands (e.g., Jerman et al.  
54 2009, Hahn-Schöfl et al. 2011, Urbanová et al. 2013, Hahn et al. 2015, Vanselow-Algan et al.  
55 2015, Zak et al. 2015, Emsens et al. 2016), the post-rewetting distribution and abundance of  
56 methane-cycling microbes in rewetted fens has seldom been examined (but see Juottonen et al.  
57 2012, Urbanová et al. 2013).

58 Peat CH<sub>4</sub> production and release is governed by a complex array of interrelated factors including  
59 climate, water level, plant community, nutrient status, site geochemistry, and the activity of  
60 microbes (i.e. bacteria and archaea) that use organic carbon as energy source (Segers 1998, Abdalla  
61 et al. 2016). To date, the vast majority of studies in rewetted fens have focused on quantifying CH<sub>4</sub>

62 emission rates in association with environmental variables such as water level, plant community,  
63 and aspects of site geochemistry (Abdalla et al. 2016). Site geochemistry indeed plays an important  
64 role for methanogenic communities, as methanogenesis is suppressed in presence of  
65 thermodynamically more favorable terminal electron acceptors (TEAs, Blodau 2011). Due to a  
66 smaller pool of more favorable electron acceptors and high availability of carbon substrates,  
67 organic-rich soils such as peat rapidly establish methanogenic conditions when anoxic (Segers  
68 1998, Keller and Bridgham 2007, Knorr and Blodau 2009). Despite their decisive role as producers  
69 (i.e. methanogens) and consumers (i.e. methanotrophs) of CH<sub>4</sub> (Conrad 1996), only a few studies  
70 have combined a characterization of the CH<sub>4</sub>-cycling microbial community, site geochemistry, and  
71 observed patterns of CH<sub>4</sub> production. Existing studies have been conducted in oligotrophic and  
72 mesotrophic boreal fens (e.g., Juottonen et al. 2005, Yrjälä et al. 2011, Juottonen et al. 2012),  
73 alpine fens (e.g., Liebner et al. 2012, Urbanová et al. 2013, Cheema et al. 2015, Franchini et al.  
74 2015), subarctic fens (Liebner et al. 2015), and incubation experiments (e.g., Jerman et al. 2009,  
75 Knorr and Blodau 2009, Urbanová et al. 2011, Emsens et al. 2016). Several studies on CH<sub>4</sub>-cycling  
76 microbial communities have been conducted in minerotrophic temperate fens (e.g., Cadillo-Quiroz  
77 et al. 2008, Liu et al. 2011, Sun et al. 2012, Zhou et al. 2017), but these sites were not subject to  
78 drainage or rewetting. To our knowledge, only one study has directly compared *in situ* abundances  
79 of methanogens and methanotrophs in drained versus rewetted fens (Juottonen et al. 2012). The  
80 studied sites, however, were nutrient-poor fens with acidic conditions.

81 While studies of nutrient-poor and mesotrophic boreal fens have documented post-rewetting CH<sub>4</sub>  
82 emissions comparable to or lower than at pristine sites (Komulainen et al. 1998, Tuittila et al. 2000,  
83 Juottonen et al. 2012), studies of temperate nutrient-rich fens have reported post-flooding CH<sub>4</sub>  
84 emissions dramatically exceeding emissions in pristine fens (e.g., Augustin and Chojnicki 2008,  
85 Hahn et al. 2015). These high emissions typically occur together with a significant dieback in  
86 vegetation, a mobilization of nutrients and electron acceptors in the upper peat layer, and increased  
87 availability of dissolved organic matter (Zak and Gelbrecht 2007, Hahn-Schöfl et al. 2011, Hahn

88 et al. 2015, Jurasinski et al. 2016). Vanselow-Algan et al. (2015) have shown that such high CH<sub>4</sub>  
89 fluxes may continue for decades following rewetting even in bogs. Because of their potential to  
90 remain significant CH<sub>4</sub> sources on decadal timescales, there is an urgent need to characterize CH<sub>4</sub>-  
91 cycling microbial communities and geochemical conditions in rewetted minerotrophic fens.  
92 Therefore, in this study, we examined microbial community composition and abundance in  
93 relation to post-flooding geochemical conditions in two rewetted fens in northeastern Germany. In  
94 both fens, CH<sub>4</sub> emissions increased dramatically after rewetting (Augustin and Chojnicki 2008,  
95 Hahn-Schöfl et al. 2011, Hahn et al. 2015, Jurasinski et al. 2016). Average annual CH<sub>4</sub> emissions  
96 have decreased in both fens since the initial peak (Franz et al. 2016, Jurasinski et al. 2016).  
97 Nevertheless, fluxes remained higher than under pre-flooding conditions (ibid.), and higher than  
98 in pristine fens (Urbanová et al. 2013, Minke et al 2016).

99 We expected patterns in microbial community composition would reflect the geochemical  
100 conditions of the two sites and hypothesized a high abundance of methanogens relative to  
101 methanotrophs in both fens. We also expected acetoclastic methanogens, which typically thrive in  
102 nutrient-rich fens (Kelly et al. 1992, Galand 2005), to dominate the methanogenic community in  
103 both fens.

104

## 105 **2 Methods**

### 106 **2.1 Study sites**

107 The nature reserve “Heiligensee and Hütelmoor” (‘Hütelmoor’ in the following, approx. 540 ha,  
108 54°12'36.66" N, 12°10'34.28" E), is a coastal, mainly minerotrophic fen complex in Mecklenburg-  
109 Vorpommern (NE Germany) that is separated from the Baltic Sea by a narrow (~100 m and less)  
110 dune dike (Fig. 1a and b). The climate is temperate in the transition zone between maritime and  
111 continental with an average annual temperature of 9.1 °C and an average annual precipitation of  
112 645 mm (data derived from grid product of the German Weather Service, reference climate period:

113 1981–2010). Episodic flooding from storm events delivers sediment and brackish water to the site  
114 (Weisner and Schernewski 2013). The vegetation is a mixture of salt-tolerant macrophytes, with  
115 dominant to semi-dominant stands of *Phragmites australis*, *Bolboschoenus maritimus*, *Carex*  
116 *acutiformis*, and *Schoenoplectus tabernaemontani*. The dominating plants are interspersed with  
117 open water bodies that are colonized by *Ceratophyllum demersum* in summer (Koch et al. 2017).  
118 Intense draining and land amelioration practices began in the 1970s, which lowered the water level  
119 to 1.6 m below ground surface and caused aerobic decomposition and concomitant degradation of  
120 the peat (Voigtländer et al. 1996). The upper peat layer varies in depth between 0.6 and 3 m and  
121 is highly degraded, reaching up to H10 on the von Post humification scale (Hahn et al. 2015).  
122 Active draining ended in 1992, but dry conditions during summertime kept the water table well  
123 below ground surface (Schönfeld-Bockholt et al. 2005, Koebisch et al. 2013) until concerns of  
124 prolonged aerobic peat decomposition prompted the installation of a weir in 2009 at the outflow  
125 of the catchment (Weisner and Schernewski 2013). After installation of the weir, the site was fully  
126 flooded year-round with an average water level of 0.6 m, and annual average CH<sub>4</sub> flux increased  
127 ~186-fold from  $0.0014 \pm 0.0006 \text{ kg CH}_4 \text{ m}^{-2} \text{ a}^{-1}$  to  $0.26 \pm 0.06 \text{ kg CH}_4 \text{ m}^{-2} \text{ a}^{-1}$  (Hahn et al. 2015).  
128 The study site polder Zarnekow ('Zarnekow' in the following, approx. 500 ha, 53°52'31.10" N,  
129 12°53'19.60" E) is situated in the valley of the River Peene in Mecklenburg-Vorpommern (NE  
130 Germany, Fig. 1a and c). The climate is slightly more continental compared to the Hütelmoor, with  
131 a mean annual precipitation of 544 mm and a mean annual temperature of 8.7 °C (German Weather  
132 Service, meteorological station Teterow, 24 km southwest of the study site; reference period 1981–  
133 2010). The fen can be classified as a river valley mire system consisting of spring mires, wider  
134 percolation mires, and flood mires along the River Peene. Drainage and low-intensity agricultural  
135 use began in the eighteenth century when land-use changed to pastures and grassland. This was  
136 intensified by active pumping in the mid-1970s. Due to land subsidence of several decimeters,  
137 after rewetting (October 2004) water table depth increased to 0.1–0.5 m above peat surface. The  
138 upper horizon is highly decomposed (0–0.3 m), followed by moderately decomposed peat to a

139 depth of 1 m and a deep layer of slightly decomposed peat up to a maximum depth of 10 m. The  
140 open water bodies are densely colonized by *Ceratophyllum* spp. and *Typha latifolia* is the dominant  
141 emergent macrophyte (Steffenhagen et al. 2012). Following flooding, CH<sub>4</sub> flux rates increased to  
142 ~0.21 kg m<sup>-2</sup> a<sup>-1</sup> (Augustin and Chojnicki 2008). No pre-rewetting CH<sub>4</sub> flux data were available  
143 for the Zarnekow site but published CH<sub>4</sub> flux rates of representative drained fens from the same  
144 region have been shown to be negligible (Augustin et al. 1998).

## 145 **2.2 Collection of peat cores and porewater samples**

146 Peat and porewater samples were collected at four different locations in Hütelmoor (October 2014)  
147 and at five locations in Zarnekow (July 2015) and spanned a distance of 1,200 m and 250 m,  
148 respectively, to cover the whole lateral extension at each site (Fig. 1b and c). Peat cores were  
149 collected with a Perspex liner (ID: 60 mm, Hütelmoor) and a peat auger (Zarnekow). In order to  
150 minimize oxygen contamination, the outer layer of the peat core was omitted. Subsamples for  
151 molecular analysis were immediately packed in 50 ml sterile Falcon tubes and stored at -80 °C  
152 until further processing.

153 Pore waters in Hütelmoor were collected with a stainless-steel push-point sampler attached to a  
154 plastic syringe to recover the samples from 10 cm depth intervals. Samples were immediately  
155 filtered with 0.45 µm membrane disposable syringe filters. Pore waters in Zarnekow were sampled  
156 with permanently installed dialysis samplers consisting of slotted polypropylene (PP) pipes  
157 (length: 636 mm, ID: 34 mm) surrounded with 0.22 µm polyethersulfone membrane. The PP pipes  
158 were fixed at distinct peat depths (surface level, 20 and 40 cm depth) and connected with PP tubes  
159 (4x6 mm IDxAD). Water samples were drawn out from the dialysis sampler pipes with a syringe  
160 through the PP tube.

161 At both sites, electrical conductivity (EC), dissolved oxygen (DO) and pH were measured  
162 immediately after sampling (Sentix 41 pH probe and a TetraCon 325 conductivity measuring cell  
163 attached to a WTW multi 340i handheld; WTW, Weilheim). Headspace CH<sub>4</sub> concentrations of  
164 porewater samples were measured with an Agilent 7890A gas chromatograph (Agilent

165 Technologies, Germany) equipped with a flame ionization detector and a Carboxen PLOT  
166 Capillary Column or HP-Plot Q (Porapak-Q) column. The measured headspace CH<sub>4</sub> concentration  
167 was then converted into a dissolved CH<sub>4</sub> concentration using the temperature-corrected solubility  
168 coefficient (Wilhelm et al. 1977). Isotopic composition of dissolved CH<sub>4</sub> for Hütelmoor was  
169 analyzed using the gas chromatography-combustion-technique (GC-C) and the gas  
170 chromatography-high-temperature-conversion-technique (GC-HTC). The gas was directly  
171 injected in a Gas Chromatograph Agilent 7890A, methane was quantitatively converted to CO<sub>2</sub>  
172 and the  $\delta^{13}\text{C}$  values were then measured with the isotope-ratio-mass-spectrometer MAT-253  
173 (Thermo Finnigan, Germany). The  $\delta^{13}\text{C}$  of dissolved methane in Zarnekow was analyzed using a  
174 laser-based isotope analyzer equipped with a small sample isotope module for analyses of discrete  
175 gas samples (cavity ring down spectroscopy CRDS; Picarro G2201-I, Santa Clara, CA, USA).  
176 Calibration was carried out before, during and after analyses using certified standards of known  
177 isotopic composition (obtained from Isometric Instruments, Victoria, BC, Canada, and from  
178 Westfalen AG, Münster, Germany). Reproducibility of results was typically +/- 1 ‰. In the  
179 presence of high concentrations of hydrogen sulfide interfering with laser-based isotope analysis,  
180 samples were treated with iron(III) sulfate to oxidize and/or precipitate sulfide. For both sites,  
181 sulfate and nitrate concentrations were analyzed by ion chromatography (IC, Thermo Fisher  
182 Scientific Dionex) using an Ion Pac AS-9-HC 4 column, partly after dilution of the sample.  
183 Dissolved metal concentrations were analyzed by ICP-OES (iCAP 6300 DUO, Thermo Fisher  
184 Scientific). Accuracy and precision were routinely checked with a certified CASS standard as  
185 previously described (Kowalski et al. 2012).

### 186 **2.3 Gene amplification and phylogenetic analysis**

187 Genomic DNA was extracted from 0.2–0.3 g of duplicates of peat soil per sample using an EurX  
188 Soil DNA Kit (Roboklon, Berlin, Germany). DNA concentrations were quantified with a  
189 Nanophotometer P360 (Implen GmbH, München, DE) and Qubit 2.0 Fluorometer (Thermo Fisher  
190 Scientific, Darmstadt, Germany). Polymerase chain reaction (PCR) amplification of bacterial and

191 archaeal 16S rRNA genes was performed using the primer combination of S-D-Bact-0341-b-S-  
192 17/S-D-Bact-0785-a-A-21 (Herlemann et al. 2011) and S-D-Arch-0349-a-S-17/S-D-Arch-0786-a-  
193 A-20 (Takai and Horikoshi 2000), respectively. The PCR mix contained 1x PCR buffer (Tris•Cl,  
194 KCl, (NH<sub>4</sub>)<sub>2</sub>SO<sub>4</sub>, 15 mM MgCl<sub>2</sub>; pH 8.7) (QIAGEN, Hilden, Germany), 0.5 μM of each primer  
195 (Biomers, Ulm, Germany), 0.2 mM of each deoxynucleoside (Thermo Fisher Scientific,  
196 Darmstadt, Germany) and 0.025 U μl<sup>-1</sup> hot start polymerase (QIAGEN, Hilden, Germany). PCR  
197 samples were kept at 95 °C for 5 min to denature the DNA, with amplification proceeding for 40  
198 cycles at 95 °C for 1 min, 56 °C for 45 s and 72 °C for 90 s; a final extension of 10 min at 72 °C  
199 was added to ensure complete amplification. PCR products were purified with a Hi Yield Gel/PCR  
200 DNA fragment extraction kit (Süd-Laborbedarf, Gauting, Germany). PCR products of three  
201 individual runs per sample were combined. PCR products of different samples were pooled in  
202 equimolar concentrations and compressed to a final volume of 10 μl with a concentration of 200  
203 ng μl<sup>-1</sup> in a vacuum centrifuge Concentrator Plus (Eppendorf, Hamburg, Germany).  
204 Illumina sequencing was performed by GATC Biotech AG using 300 bp paired-end mode and a  
205 20% PhiX Control v3 library to counteract the effects of low-diversity sequence libraries. Raw  
206 data was demultiplexed using an own script based on CutAdapt (Martin 2011). Ambiguous  
207 nucleotides at sequence ends were trimmed and a 10% mismatch was allowed for primer  
208 identification, whereas barcode sequences needed to be present without any mismatches and with  
209 a minimum Phred-Score of Q25 for each nucleotide. After sorting, overlapping paired-end reads  
210 were merged using PEAR [Q25, p 0.0001, v20] (Zhang et al. 2014). The orientation of the merged  
211 sequences was standardized according to the barcode information obtained from demultiplexing.  
212 Low-quality reads were removed using Trimmomatic [SE, LEADING Q25, TRAILING Q25,  
213 SLIDINGWINDOW 5:25; MINLEN 200] (Bolger et al. 2014). Chimeric sequences were removed  
214 using USEARCH 6.1 and the QIIME-script identify\_chimeric\_seqs.py (Caporaso et al. 2010). Pre-  
215 processed sequences were taxonomically assigned to operational taxonomic units (OTUs) at a  
216 nucleotide sequence identity of 97% using QIIME's pick\_open\_reference\_otus.py script and the



217 GreenGenes database 13.05 (McDonald et al. 2012) as reference. The taxonomic assignment of  
218 representative sequences was further checked for correct taxonomical classification by  
219 phylogenetic tree calculations in the ARB environment referenced against the SILVA database  
220 (<https://www.arb-silva.de>) version 119 (Quast et al. 2013). The resulting OTU table was filtered  
221 for singletons, OTUs assigned to chloroplasts or mitochondria, and for low-abundance OTUs  
222 (below 0.2% within each sample). Archaeal and bacterial samples were processed separately while  
223 only OTUs that were assigned to the respective domain were considered for further analysis. The  
224 16S rRNA gene sequence data have been deposited at NCBI under the Bioproject PRJNA356778.  
225 Hütelmoor sequence read archive accession numbers are SRR5118134-SRR5118155 for bacterial  
226 and SRR5119428-SRR5119449 for archaeal sequences, respectively. Zarnekow accession  
227 numbers are SRR6854018-SRR6854033 and SRR6854205-SRR6854220 for bacterial and  
228 archaeal sequences, respectively.

#### 229 **2.4 qPCR analysis**

230 Quantitative polymerase chain reaction (qPCR) for the determination of methanotrophic and  
231 methanogenic functional gene copy numbers and overall bacterial 16S rRNA gene copy numbers  
232 was performed via SybrGreen assays on a Bio-Rad CFX instrument (Bio-Rad, Munich, Germany)  
233 with slight modifications after Liebner et al. (2015). The functional methanotrophic *pmoA* gene  
234 was amplified with the primer combination A189F/Mb661 (Kolb et al. 2003) suitable for detecting  
235 all aerobic methanotrophic Proteobacteria. Annealing was done at 55 °C after a 7-cycle-step  
236 touchdown starting at 62 °C. The functional methanogenic *mcrA* gene was amplified with the  
237 *mlas/mcrA*-rev primer pair (Steinberg and Regan 2009) with annealing at 57 °C. The bacterial 16S  
238 rRNA gene was quantified with the primers Eub341F/Eub534R according to Degelmann et al.  
239 (2010) with annealing at 58 °C. Different DNA template concentrations were tested prior to the  
240 qPCR runs to determine optimal template concentration without inhibitions through co-extracts.  
241 The 25 µl reactions contained 12.5 µl of iTaq universal Sybr Green supermix (Bio-Rad, Munich,  
242 Germany), 0.25 µM concentrations of the primers, and 5 µl of DNA template. Data acquisition

243 was always done at 80 °C to avoid quantification of primer dimers. The specificity of each run  
244 was verified through melt-curve analysis and gel electrophoresis. Only runs with efficiencies  
245 between 82 and 105% were used for further analysis. Measurements were performed in triplicates.  
246 We determined the ratio of methanogens to methanotrophs based on gene abundances of *mcrA* and  
247 *pmoA*. The marker gene for the soluble monooxygenase, *mmoX*, was neglected due to the absence  
248 of *Methylocella* in the sequencing data (Fig. 3).

## 249 **2.5 Data visualization and statistical analysis**

250 All data visualization and statistical analysis were done in R (R Core Team). The taxonomic  
251 relative abundances across samples were visualized through bubble plots with the R package  
252 ggplot2 (Wickham 2009). Differences in microbial community composition were visualized with  
253 2-dimensional non-metric multidimensional scaling (NMDS) based on Bray-Curtis distances. The  
254 NMDS ordinations were constructed using R package vegan (Oksanen et al. 2017). An  
255 environmental fit was performed on the ordinations to determine the measured geochemical  
256 parameters that may influence community composition. The geochemical data were fitted to the  
257 ordinations as vectors with a significance of  $p < 0.05$ . Depth profiles were constructed with the  
258 porewater geochemical data, as well as with the microbial abundances, to elucidate depthwise  
259 trends and assess whether differences in microbial community and abundances among the two fens  
260 are related to differences in their respective geochemistry.

261

## 262 **3 Results**

### 263 **3.1 Community composition of bacteria and archaea**

264 Bacterial sequences could be affiliated into a total of 30 bacterial phyla (Fig. 2). Among them,  
265 Proteobacteria, Acidobacteria, Actinobacteria, Chloroflexi, Nitrospirae and Bacteroidetes were  
266 present in all samples. With mean relative abundance of 48%, Proteobacteria was the most  
267 abundant phylum. Some taxa (e.g., Verrucomicrobia, Atribacteria (OP9), and AD3) were present  
268 only in Hütelmoor. Variation in community composition was larger in Hütelmoor samples than in

269 Zarnekow. Within Proteobacteria, the alpha subdivision was the most dominant group, having  
270 contributed 26.7% to all the libraries on average (Fig. 3). The family *Hyphomicrobiaceae*  
271 dominated the Alphaproteobacteria, and was distributed evenly across samples, but missing in the  
272 surface and bottom peat layers in Hütelmoor core (HC) 2. In addition, methanotrophs were clearly  
273 in low abundance across all samples. Of the few methanotrophs that were detected, type II  
274 methanotrophs (mainly *Methylocystaceae*) outcompeted type I methanotrophs (mainly  
275 *Methylococcaceae*) in the community, while members of the genus *Methylocella* were absent (Fig.  
276 3).

277 Within the archaeal community, Bathyarchaeota were mostly dominating over Euryarchaeota (Fig.  
278 4). The MCG group (mainly the order of pGrfC26) in Bathyarchaeota prevailed across all samples  
279 but was especially abundant in HC 2 samples. In addition to Bathyarchaeota, methanogenic  
280 archaea were important, and on average contributed 30.6% to the whole archaeal community.  
281 Among the methanogens, acetoclastic methanogens were more abundant in most of the samples  
282 and *Methanosaetaceae* (24.8%) were the major component. They were present in most samples  
283 and much more dominant than *Methanosarcinaceae* (2.0%). Hydrogenotrophic methanogens, such  
284 as *Methanomassiliicoccaceae* (1.6%), *Methanoregulaceae* (1.2%) and *Methanocellaceae* (0.6%),  
285 albeit low in abundance, were detected in many samples. Hütelmoor samples displayed greater  
286 variability in archaeal community composition compared to Zarnekow samples. The putative  
287 anaerobic methanotrophs of the ANME-2D (Raghoebarsing et al. 2006) clade occurred in patchy  
288 abundance with dominance in single spots of both sites. In HC 1 they represented a mean relative  
289 abundance of 40.9% of total archaeal reads but were almost absent in all other Hütelmoor cores.  
290 In Zarnekow core (ZC) 3, ANME-2D represented up to approximately 30% of all archaea but were  
291 otherwise low in abundance.

### 292 **3.2 Environmental characteristics and site geochemistry**

293 The two rewetted fens varied substantially in their environmental characteristics (e.g., proximity  
294 to the sea) and porewater geochemistry (Fig. 5, Tables 1 and 2). Electrical conductivity was more

295 than three times higher in Hütelmoor than in Zarnekow, averaging 5.3 and 1.5 mS cm<sup>-1</sup>,  
296 respectively. Mean pH was approximately neutral (6.5 to 7) in the upper peat profile and  
297 comparable in both fens until a depth of about 30 cm where pH was ~6 in the Hütelmoor.  
298 Concentrations of the TEAs nitrate and sulfate were lower in Zarnekow and near zero in the pore  
299 water at all depths, while nitrate and sulfate were abundant in the upper and lower peat profile in  
300 Hütelmoor at ~1.5 to 3.0 mM and ~4 to 20 mM, respectively (Fig. 5). Iron concentrations were  
301 higher in the Hütelmoor pore water, while manganese concentrations were higher in Zarnekow  
302 pore water. Dissolved oxygen concentrations in the upper peat profile (i.e. 0 to 25 cm depths) were  
303 much higher in Hütelmoor than in Zarnekow (Fig. 5). Here DO concentrations averaged ~0.250  
304 mM until a depth of 15 cm at which they dropped sharply, reaching concentrations slightly below  
305 0.050 mM at 25 cm. In Zarnekow, DO concentrations did not exceed 0.1 mM and varied little with  
306 depth. Regarding geochemical conditions, HC 1 was distinct from all other Hütelmoor cores and  
307 more similar to Zarnekow cores. In HC 1 – the core taken nearest to potential freshwater sources  
308 (Fig. 1b) – pore water EC and DO concentrations were lower while pH was slightly higher than  
309 all other Hütelmoor cores. Moreover, this was the only Hütelmoor core where nitrate  
310 concentrations were undetectable (Fig. 5). Dissolved CH<sub>4</sub> concentrations were high, varied within  
311 and among fens and were slightly higher in Zarnekow pore water. Stable isotope ratios of  $\delta^{13}\text{C}$ -  
312 CH<sub>4</sub> (Fig. 5) in the upper peat (approx. -59‰) suggest a predominance of acetoclastic  
313 methanogenesis, with a shift to hydrogenotrophic methanogenesis around -65‰ in the lower peat  
314 profile. Also, shifts toward less negative  $\delta^{13}\text{C}$ -CH<sub>4</sub> values in the upper peat layer, as in HC 1 and  
315 HC 2, could indicate partial oxidation of CH<sub>4</sub> occurred (Chasar et al. 2000).

### 316 **3.3 Environmental drivers of microbial community composition**

317 Bacterial and archaeal population at both peatland sites showed distinct clustering (Fig. 6) with  
318 similarly high intra- and inter-site variations but greater overall variation in community  
319 composition in the Hütelmoor. Community composition varied much more strongly in HC 2 than  
320 in any other core (grey dashed-line polygon in Fig. 6). Bacterial communities in HC 1 were more

321 similar to communities in all Zarnekow cores than in other Hütelmoor cores (Fig. 6a). The archaeal  
322 community in HC 1 was more similar to Zarnekow cores as well (Fig. 6b). Overall, the influence  
323 of depth on microbial community was evident, especially in the Hütelmoor where the differences  
324 were more pronounced. Environmental fit vectors suggest pH, oxygen and alternative TEA  
325 availability as important factors influencing microbial community composition. The EC vector  
326 suggests the importance of brackish conditions in shaping microbial communities in the Hütelmoor  
327 (Fig. 6a - c).

### 328 **3.4 Total microbial and functional gene abundances**

329 Quantitative PCR results show that in both fens, *mcrA* abundance is up to two orders of magnitude  
330 greater than *pmoA* abundance (Fig. 7, Tables 1 and 2). Gene copy numbers of *mcrA* are overall  
331 higher and spatially more stable in Zarnekow than in Hütelmoor. Total microbial abundance  
332 declined with depth more strongly in Hütelmoor than in Zarnekow (Fig. 7). There was a  
333 pronounced decrease in microbial abundances at 20 cm depth in the Hütelmoor. For example, 16S  
334 rRNA gene and *pmoA* gene copy numbers in deeper samples (below 20 cm depth) are one order  
335 of magnitude lower than in upper samples on average, while the *mcrA* gene abundance are  
336 approximately two orders of magnitude lower. Hütelmoor samples also exhibited larger  
337 heterogeneity in terms of abundances than Zarnekow samples.

338

## 339 **4 Discussion**

### 340 **4.1 Fen geochemistry and relations to microbial community composition**

341 The rewetting of drained fens promotes elevated CH<sub>4</sub> production and emission, which can  
342 potentially offset carbon sink benefits. Very few studies have attempted to link microbial  
343 community dynamics and site geochemistry with observed patterns in CH<sub>4</sub> production and/or  
344 emission in rewetted fens while such data are crucial for predicting long-term changes to CH<sub>4</sub>  
345 cycling (Galand et al. 2002, Yrjälä et al. 2011, Juottonen et al. 2012). In this study, we show that  
346 CH<sub>4</sub>-cycling microbial community composition is related to patterns in site geochemistry in two

347 rewetted fens with high CH<sub>4</sub> emissions, high methanogen abundances, and low methanotroph  
348 abundances. Our results suggest that high methanogen abundances concurrent with low  
349 methanotroph abundances contribute to increased CH<sub>4</sub> production and the resulting high emissions  
350 in rewetted peatlands with readily available substrate. Thus, we present microbial evidence for  
351 sustained elevated CH<sub>4</sub> emissions in mostly inundated rewetted temperate fens.

352 The environmental conditions and associated geochemistry of the two rewetted fens were largely  
353 different. Depth profiles of porewater geochemical parameters show the fens differed in EC  
354 throughout the entire peat profile, while pH and concentrations of alternative TEAs differed at  
355 certain depths. In general, concentrations of TEAs oxygen, sulfate, nitrate, and iron were higher  
356 in the Hütelmoor. In Zarnekow, geochemical conditions varied little across the fen and along the  
357 peat depth profiles (Fig. 5). As expected, the geochemical heterogeneity was reflected in microbial  
358 community structure in both sites, suggesting the importance of environmental characteristics and  
359 associated geochemical conditions as drivers of microbial community composition (Figs. 2, 3, 4,  
360 6). The NMDS ordinations (Fig. 6) show significant variation in archaeal and bacterial community  
361 composition in the coastal brackish fen, and much less variation in the freshwater riparian fen.  
362 Environmental fit vectors (Fig. 6) suggest that salinity (indicated by the EC vector), pH, oxygen  
363 and alternative TEA availability are the most important measured factors influencing microbial  
364 communities in the two fens. Patterns in microbial community composition have previously been  
365 linked to salinity (e.g., Chambers et al. 2016), pH (e.g., Yrjälä et al. 2011), and TEA availability  
366 in peatlands (e.g., He et al. 2015).

367 Comparing the geochemical depth profiles (Fig. 5) with the relative abundance of bacteria and  
368 archaea (Figs. 3 and 4) provides a more complete picture of the relationships between microbial  
369 communities and site geochemistry, particularly with respect to TEA utilization. While the  
370 porewater depth profiles suggest there is little nitrate available for microbial use in HC 1, the  
371 relative abundance plot for Archaea showed that this core was dominated by ANME-2D. ANME-  
372 2D were recently discovered to be anaerobic methanotrophs that oxidize CH<sub>4</sub> performing reverse

373 methanogenesis using nitrate as an electron acceptor (Haroon et al. 2013). However, ANME-2D  
374 has also been implicated in the iron-mediated anaerobic oxidation of methane (Ettwig et al. 2016),  
375 and the HC 1 site showed slightly higher total iron concentrations. The relevance of ANME-2D as  
376 CH<sub>4</sub> oxidizers in terrestrial habitats is still not clear. Rewetting converts the fens into widely  
377 anaerobic conditions, thus providing conditions suitable for the establishment of anaerobic  
378 oxidation of methane, but this has yet to be demonstrated in fens. The patchy occurrence and  
379 locally high abundance of ANME-2D both in Hütelmoor and in Zarnekow suggests an ecological  
380 relevance of this group. Shifts toward a less negative  $\delta^{13}\text{C}\text{-CH}_4$  signature in the upper peat profile,  
381 especially in HC 1 where ANME-2D was abundant, may indicate partial oxidation occurred, but  
382 we could only speculate whether or not they are actively involved in CH<sub>4</sub> oxidation.  
383 Although TEA input may be higher in the Hütelmoor, here, methanogenic conditions also  
384 predominate. This finding contrasts the measured oxygen concentrations in the upper peat profile,  
385 however seasonal analysis of oxygen concentrations in both sites suggests highly fluctuating  
386 oxygen regimes both spatially and temporary (data not shown). Such non-uniform distribution of  
387 redox processes has already been described elsewhere, in particular for methanogenesis (Hoehler  
388 et al. 2001, Knorr et al. 2009). It is possible that oxygen levels in both fens are highly dynamic  
389 allowing for both aerobic and anaerobic carbon turnover processes. Further, oxygen may not  
390 necessarily be available within aggregates in which anaerobic pathways predominate. Anaerobic  
391 conditions are also reflected by the extensive and stable occurrence of the strictly anaerobic  
392 syntrophs (e.g., *Syntrophobacteraceae*, *Syntrophaceae*) in most samples, even in the top  
393 centimeters. This suggests that syntrophic degradation of organic material is taking place in the  
394 uppermost layer and the fermented substances are easily available for methanogens. Recent studies  
395 from wetlands also show that methanogenesis can occur in aerobic layers, driven mainly by  
396 Methanosaeta (Narrowe et al. 2017, Wagner 2017), which were detected in a high abundance in  
397 this study (Fig. 4). As geochemistry and microbial community composition differ among the sites  
398 in this study, it is thus notable that a similarly high abundance of methanogens, and low abundance

399 of methanotrophs was detected in both fens. The dominance of methanogens implies that readily  
400 available substrates and favorable geochemical conditions promote high anaerobic carbon turnover  
401 despite seasonally fluctuating oxygen concentrations in the upper peat layer.

#### 402 4.2 Microbial evidence for high CH<sub>4</sub> emissions

403 Methanogens (mainly *Methanosaetaceae*) dominated nearly all of the various niches detected in  
404 this study, while methanotrophs were highly under-represented in both sites (Figs. 3 and 4).  
405 Functional and ribosomal gene copy numbers not only show a high ratio of methanogen to  
406 methanotroph abundance (Fig. 7) irrespective of site and time of sampling, but also a small  
407 contribution of methanotrophs to total bacterial population in both sites. Methanotrophs constitute  
408 only ~0.06% of the total bacterial population in the Hütelmoor and ~0.05% at Zarnekow. It should  
409 be noted that in this study we measured only gene abundances and not transcript abundances, so  
410 that the pool both of active methanogens and methanotrophs was likely smaller than the numbers  
411 presented here (Freitag and Prosser 2009, Freitag et al. 2010, Cheema et al. 2015, Franchini et al.  
412 2015). Also, as we were unable to obtain microbial samples from before rewetting, a direct  
413 comparison of microbial abundances was not possible. Compared to pristine fens, however, we  
414 detected a relatively low abundance of methanotrophs. Liebner et al. (2015), for example, found  
415 methanotrophs represented 0.5% of the total bacterial community in a pristine, subarctic  
416 transitional bog/fen palsa, while *mcrA* and *pmoA* abundances were nearly identical. In a pristine  
417 Swiss alpine fen, Liebner et al. (2012) found methanotrophs generally outnumbered methanogens  
418 by an order of magnitude. Cheema et al. (2015) and Franchini et al. (2015) reported *mcrA*  
419 abundances higher than *pmoA* abundances by only one order of magnitude in a separate Swiss  
420 alpine fen. In the rewetted fens in our study, *mcrA* gene abundance was up to two orders of  
421 magnitude higher than *pmoA* abundance (Fig. 7). As most methanotrophs live along the oxic-  
422 anoxic boundary of the peat surface and plant roots therein (Le Mer and Roger 2001), the low  
423 methanotroph abundances in both fens could be explained by disturbances to this boundary zone  
424 and associated geochemical pathways following inundation. In rewetted fens, a massive plant



425 dieback has been observed along with strong changes in surface peat geochemistry (Hahn-Schöfl  
426 et al. 2011, Hahn et al. 2015). The anoxic conditions at the peat surface caused by inundation may  
427 have disturbed existing methanotrophic niches, and further, hindered the establishment of new  
428 ones, as oxygen availability is the most important factor governing the activity of most  
429 methanotrophs (Le Mer and Roger 2001, Hernandez et al. 2015).

430 Comparable studies have so far been conducted in nutrient-poor or mesotrophic fens where post-  
431 rewetting CH<sub>4</sub> emissions, though higher than pre-rewetting, did not exceed those of similar pristine  
432 sites (e.g., Yrjälä et al. 2011, Juottonen et al. 2005, Juottonen et al. 2012). Nevertheless, there is  
433 mounting evidence linking CH<sub>4</sub>-cycling microbe abundances to CH<sub>4</sub> dynamics in rewetted fens.  
434 Juottonen et al. (2012), for example, compared *pmoA* gene abundances in three natural and three  
435 rewetted fens and found them to be lower in rewetted sites. The same study also measured a lower  
436 abundance of *mcrA* genes in rewetted sites, which was attributed to a lack of available labile carbon  
437 compounds. In peatlands, and especially fens, litter and root exudates from vascular plants can  
438 stimulate CH<sub>4</sub> emissions (Megonigal et al. 2005, Bridgham et al. 2013, Agethen and Knorr 2018),  
439 and excess labile substrate has been proposed as one reason for dramatic increases in CH<sub>4</sub>  
440 emissions in rewetted fens (Hahn-Schöfl et al. 2011). Future studies should compare pre- and post-  
441 rewetting microbial abundances along with changes in CH<sub>4</sub> emissions, plant communities, and  
442 peat geochemistry to better assess the effect rewetting has on the CH<sub>4</sub>-cycling microbial  
443 community.

444

## 445 **5 Conclusion**

446 Despite a recent increase in the number of rewetting projects in Northern Europe, few studies have  
447 characterized CH<sub>4</sub>-cycling microbes in restored peatlands, especially fens. In this study, we show  
448 that rewetted fens differing in geochemical conditions and microbial community composition have  
449 a similarly low abundance of methanotrophs, a high abundance of methanogens, and an established  
450 anaerobic carbon cycling microbial community. Comparing these data to pristine wetlands with

451 lower CH<sub>4</sub> emission rates, we found that pristine wetlands generally have a higher abundance of  
452 methanotrophs than measured in the fens in this study, suggesting the inundation and associated  
453 anoxia caused by flooding disturbs methanotrophic niches and may negatively affect the ability of  
454 methanotrophic communities to establish. The abundances of methane producers and consumers  
455 are thus suggested as important drivers for continued elevated CH<sub>4</sub> emissions following the  
456 rewetting of drained fens. Our results suggest that in the context of CH<sub>4</sub> cycling, rewetting drained  
457 peatlands by flooding may be problematic if post-rewetting conditions hinder methanotroph  
458 establishment. Management decisions regarding rewetting processes should consider that  
459 disturbances to methanotrophic niches is possible if rewetting leads to long-term inundation of the  
460 peat surface.

461

#### 462 **Competing interests**

463 The authors declare that they have no conflict of interest.

464

#### 465 **6 Acknowledgements**

466 This study was conducted within the framework of the Research Training Group 'Baltic  
467 TRANSCOAST' funded by the DFG (Deutsche Forschungsgemeinschaft) under grant number  
468 GRK 2000. This is Baltic TRANSCOAST publication no. GRK2000/000X. The financial support  
469 to Xi Wen (Grant No. 201408620031 to X.W.) provided by the China Scholarship Council (CSC)  
470 is gratefully acknowledged. This study was supported by the Helmholtz Gemeinschaft (HGF) by  
471 funding the Helmholtz Young Investigators Group of S.L. (VH-NG-919) and T.S. (Grant VH-NG-  
472 821), a Helmholtz Postdoc Programme grant to F.K. (Grant PD-129), and further supported by the  
473 Terrestrial Environmental Observatories (TERENO) Network. The Leibniz Institute for Baltic Sea  
474 Research (IOW) is also acknowledged for funding the lab work in this study. The European Social  
475 Fund (ESF) and the Ministry of Education, Science and Culture of Mecklenburg-Western  
476 Pomerania funded this work within the scope of the project WETSCAPES (ESF/14-BM-A55-

477 0030/16). Dr. Matthias Gehre, head of the Laboratory of Stable Isotopes at the Helmholtz Centre  
478 for Environmental Research, is acknowledged for measuring carbon isotopes of methane from  
479 Hütelmoor samples. Anke Saborowski and Anne Köhler are also acknowledged for support in the  
480 laboratory.

481

482

483

484

485

486

487

488

489

490

491

492

493

494

495

496

497

498

499

500

501

502

503

504

505

506

507

508 **References**

- 509
- 510 Abdalla, M., Hastings, A., Truu, J., Espenberg, M., Mander, U., and Smith, P.: Emissions of  
511 methane from northern peatlands: a review of management impacts and implications for future  
512 management options, *Ecology and Evolution*, 6, 7080-7102, doi:10.1002/ece3.2469, 2016.
- 513
- 514 Agethen, S. and Knorr, K.-H.: *Juncus effusus* mono-stands in restored cutover peat bogs – Analysis  
515 of litter quality, controls of anaerobic decomposition, and the risk of secondary carbon loss. *Soil*  
516 *Biology and Biochemistry*, 117, 139-152, doi:10.1016/j.soilbio.2017.11.020, 2018.
- 517
- 518 Augustin, J., Merbach, W., and Rogasik, J.: Factors influencing nitrous oxide and methane  
519 emissions from minerotrophic fens in northeast Germany, *Biology and Fertility of Soils*, 28(1), 1-  
520 4, doi:10.1007/s003740050455, 1998.
- 521
- 522 Augustin, J. and Chojnicki, B.: Austausch von klimarelevanten Spurengasen, Klimawirkung und  
523 Kohlenstoffdynamik in den ersten Jahren nach der Wiedervernässung von degradiertem  
524 Niedermoorgrünland (Exchange of climate relevant trace gases, climate effect and carbon  
525 dynamics in the first years after re-wetting of degraded fen grassland), In: Gelbrecht, J., Zak, D.,  
526 and Augustin, J. (eds.), *Phosphor- und Kohlenstoff- Dynamik und Vegetationsentwicklung in*  
527 *wiedervernässten Mooren des Peenetales in Mecklenburg-Vorpommern (Phosphorus and carbon*  
528 *dynamics and vegetation development in re-wetted peatland of the Peene valley in Mecklenburg-*  
529 *Western Pomerania)*, Leibniz-Institut für Gewässerökologie und und Binnenfischerei, Berlin, pp.  
530 50–67 (in German), 2008.
- 531
- 532 Blodau, C.: Thermodynamic control on terminal electron transfer and methanogenesis. In:  
533 Tratnyek, P. G., Grundl, T. J., and Haderlein, S. B. (eds.), *Aquatic Redox Chemistry*, ACS  
534 *Symposium Series*, American Chemical Society, distributed in print by Oxford University Press  
535 Inc., Washington, DC, pp. 65-82., doi:10.1021/bk-2011-1071.ch004, 2011.
- 536
- 537 Bolger, A. M., Lohse, M., and Usadel, B.: Trimmomatic: a flexible trimmer for Illumina sequence  
538 data, *Bioinformatics*, 30, 2114-2120, doi:10.1093/bioinformatics/btu170., 2014.
- 539
- 540 Bridgham, S. D., Cadillo-Quiroz, H., Keller, J. K., and Zhuang, Q.: Methane emissions from  
541 wetlands: biogeochemical, microbial, and modeling perspectives from local to global scales,  
542 *Global Change Biology* 19, 1325-1356, doi:10.1111/gcb.12131, 2013.
- 543
- 544 Cadillo-Quiroz, H., Yashiro, E., Yavitt, J. B., and Zinder, S. H.: Characterization of the archaeal  
545 community in a minerotrophic fen and terminal restriction fragment length polymorphism-directed

546 isolation of a novel hydrogenotrophic methanogen, *Applied and Environmental Microbiology*  
547 74(7), 2059-2068, doi:10.1128/AEM.02222-07, 2008.  
548

549 Caporaso, J. G., Kuczynski, J., Stombaugh, J., Bittinger, K., Bushman, F. D., Costello, E. K.,  
550 Fierer, N., Peña, A. G., Goodrich, J. K., Gordon, J. I., Huttley, G. A., Kelley, S. T., Knights, D.,  
551 Koenig, J. E., Ley, R. E., Lozupone, C. A., McDonald, D., Muegge, B. D., Pirrung, M., Reeder,  
552 J., Sevinsky, J. R., Turnbaugh, P. J., Walters, W. A., Widmann, J., Yatsunenko, T., Zaneveld, J.,  
553 and Knight, R.: QIIME allows analysis of high-throughput community sequencing data, *Nature*  
554 *Methods*, 7(5), 335-336, doi:10.1038/nmeth.f.303, 2010.  
555

556 Chambers, L. G., Guevara, R., Boyer, J. N., Troxler, T. G., and Davis, S. E.: Effects of salinity  
557 and inundation on microbial community structure and function in a mangrove peat soil, *Wetlands*,  
558 36(2), 361-371, doi:10.1007/s13157-016-0745-8, 2016.  
559

560 Chasar, L. S., Chanton, J. P., Glaser, P. H., and Siegel, D. I.: Methane concentration and stable  
561 isotope distribution as evidence of rhizospheric processes: comparison of a fen and bog in the  
562 Glacial Lake Agassiz Peatland complex, *Annals of Botany*, 86, 655-663,  
563 doi:10.1006/anbo.2000.1172, 2000.  
564

565 Cheema, S., Zeyer, J., and Henneberger, R.: Methanotrophic and methanogenic communities in  
566 Swiss alpine fens dominated by *Carex rostrata* and *Eriophorum angustifolium*, *Applied and*  
567 *Environmental Microbiology*, 81(17), 5832-5844, doi:10.1128/AEM.01519-15, 2015.  
568

569 Conrad, R.: Soil microorganisms as controllers of atmospheric trace gases (H<sub>2</sub>, CO, CH<sub>4</sub>, OCS,  
570 N<sub>2</sub>O, and NO), *Microbiological Reviews*, 60(4), 609-640, 1996.  
571

572 Degelmann, D. M., Borken, W., Drake, H. L., and Kolb, S.: Different atmospheric methane-  
573 oxidizing communities in European beech and Norway spruce soils, *Applied and Environmental*  
574 *Microbiology*, 76, 3228-3235, doi:10.1128/AEM.02730-09, 2010.  
575

576 Emsens, W.-J., Aggenbach, C. J. S., Schoutens, K., Smolders, A. J. P., Zak, D., and van Diggelen,  
577 R.: Soil iron content as a predictor of carbon and nutrient mobilization in rewetted fens, *PLoS*  
578 *ONE*, 11(4), e0153166, doi:10.1371/journal.pone.0153166, 2016.  
579

580 Franchini, A. G., Henneberger, R., Aeppli, M., and Zeyer, J.: Methane dynamics in an alpine fen:  
581 a field-based study on methanogenic and methanotrophic microbial communities, *FEMS*  
582 *Microbiology Ecology*, 91(3), 1-13, doi:10.1093/femsec/fiu032, 2015.  
583

584 Franz, D., Koebisch, F., Larmanou, E., Augustin, J., and Sachs, T.: High net CO<sub>2</sub> and CH<sub>4</sub> release  
585 at a eutrophic shallow lake on a formerly drained fen, *Biogeosciences*, 13, 3051-3070,  
586 doi:10.5194/bg-13-3051-2016, 2016.  
587

588 Freitag, T. E. and Prosser, J. I.: Correlation of methane production and functional gene  
589 transcription activity in a peat soil, *Applied and Environmental Microbiology*, 75(21), 6679-6687,  
590 doi:10.1128/AEM.01021-09, 2009.  
591

592 Freitag, T. E., Toet, S., Ineson, P., and Prosser, J. I.: Links between methane flux and  
593 transcriptional activities of methanogens and methane oxidizers in a blanket peat bog, *FEMS*  
594 *Microbiology Ecology*, 73, 157-165, doi:10.1111/j.1574-6941.2010.00871.x, 2010.  
595

596 Galand, P. E., Saarnio, S., Fritze, H., and Yrjälä, K.: Depth related diversity of methanogen  
597 Archaea in Finnish oligotrophic fen, *FEMS Microbiology Ecology*, 42, 441-449,  
598 doi:10.1111/j.1574-6941.2002.tb01033.x., 2002.  
599

600 Galand, P. E., Fritze, H., Conrad, R., and Yrjälä, K.: Pathways for methanogenesis and diversity  
601 of methanogenic archaea in three boreal peatland ecosystems, *Applied and Environmental*  
602 *Microbiology*, 71(4), 2195-2198, doi:10.1128/AEM.71.4.2195-2198.2005, 2005.  
603

604 Hahn, J., Köhler, S., Glatzel, S., and Jurasinski, G.: Methane exchange in a coastal fen the first  
605 year after flooding – a systems shift, *PLOS ONE*, 10(10), e0140657, doi:10.1371/journal.  
606 pone.0140657, 2015.  
607

608 Hahn-Schöfl, M., Zak, D., Mincke, M., Gelbrecht, J., Augustin, J., and Freibauer, A.: Organic  
609 sediment formed during inundation of a degraded fen grassland emits large fluxes of CH<sub>4</sub> and CO<sub>2</sub>,  
610 *Biogeosciences*, 8, 1539-1550, doi:10.5194/bg-8-1539-2011, 2011.  
611

612 Haroon, M. F., Hu, S., Shi, Y., Imelfort, M., Keller, J., Hugenholtz, P., Yuan, Z., and Tyson, G.:  
613 Anaerobic oxidation of methane couple to nitrate reduction in a novel archaeal lineage, *Nature*,  
614 500, 567-570, doi:10.1038/nature12375, 2013.  
615

616 He, S., Malfatti, S. A., McFarland, J. W., Anderson, F. E., Pati, A., Huntemann, M., Tremblay, J.,  
617 del Rio, T. G., Waldrop, M. P., Windham-Myers, L., and Tringe, S. G.: Patterns in wetland  
618 microbial community composition and functional gene repertoire associated with methane  
619 emissions, *mBio*, 6(3), 1-15, doi:10.1128/mBio.00066-15, 2015.  
620

621 Herlemann, D. P., Labrenz, M., Jürgens, K., Bertilsson, S., Waniek, J. J., and Andersson, A.F.:  
622 Transitions in bacterial communities along the 2000 km salinity gradient of the Baltic Sea, *ISME*  
623 *J*, 5(10), 1571-1579, doi:10.1038/ismej.2011.41., 2011.  
624

625 Hernandez, M. E., Beck, D. A., Lidstrom, M. E., and Chistoserdova, L.: Oxygen availability is a  
626 major factor in determining the composition of microbial communities involved in methane  
627 oxidation, *PeerJ*, 3, e801, doi:10.7717/peerj.801, 2015.  
628

629 Hoehler, T. M., Alperin, M. J., Albert, D. B., and Martens, C. S.: Apparent minimum free energy  
630 requirements for methanogenic Archaea and sulfate-reducing bacteria in an anoxic marine  
631 sediment, *FEMS Microbiology Ecology*, 38, 33-41, doi:10.1016/S0168-6496(01)00175-1, 2001.  
632

633 Jerman, V., Metje, M., Mandic-Mulec, I., and Frenzel, P.: Wetland restoration and  
634 methanogenesis: the activity of microbial populations and competition for substrates at different  
635 temperatures, *Biogeosciences*, 6, 1127-1138, doi:10.5194/bg-6-1127-2009, 2009.  
636

637 Joosten, H., Brust, K., Couwenberg, J., Gerner, A., Holsten, B., Permien, T., Schäfer, A.,  
638 Tanneberger, F., Trepel, M., and Wahren, A.: MoorFutures® Integration of additional ecosystem  
639 services (including biodiversity) into carbon credits – standard, methodology and transferability  
640 to other regions, Bundesamt für Naturschutz (Federal Ministry for the Environment, BfN), BfN-  
641 Skripten 407, Bonn, Germany, 2015.  
642

643 Juottonen, H., Galand, P. E., Tuittila, E.-S., Laine, J., Fritze, H., Yrjälä, K.: Methanogen  
644 communities and bacteria along an ecohydrological gradient in a northern raised bog complex,  
645 *Environmental microbiology*, 7(10), 1547-1557, doi: 10.3389/fmicb.2015.00356, 2015.  
646

647 Juottonen, H., Hynninen, A., Nieminen, M., Tuomivirta, T. T., Tuittila, E.-S., Nousiainen, H.,  
648 Kell, D. K., Yrjälä, K., Tervahauta, A., and Fritze, H.: Methane-cycling microbial communities  
649 and methane emission in natural and restored peatlands, *Applied and Environmental*  
650 *Microbiology*, 78(17), 6386-6389, doi:10.1128/AEM.00261-12, 2012.  
651

652 Jurasinski, G., Glatzel, S., Hahn, J., Koch, S., Koch, M., and Koebisch, F.: Turn on, fade out –  
653 Methane exchange in a coastal fen over a period of six years after rewetting, *Geophysical Research*  
654 *Abstracts*, 18, EGU2016-14899, 2016.  
655

656 Keller, J. K. and Bridgham, S. D.: Pathways of anaerobic carbon cycling across an ombrotrophic-  
657 minerotrophic peatland gradient, *Limnology and Oceanography*, 52(1), 96-107,  
658 doi:10.4319/lo.2007.52.1.0096, 2007.  
659

660 Kelly, C. A., Dice, N. B. and Martens, C. S.: Temporal variations in the stable carbon isotopic  
661 composition of methane emitted from Minnesota peatlands, *Global Biogeochemical Cycles*, 6(3),  
662 263-269, doi:10.1029/92GB01478, 1992.  
663

664 Knorr, K.-H., Lischeid, G., and Blodau, C.: Dynamics of redox processes in a minerotrophic fen  
665 exposed to a water table manipulation, *Geoderma*, 153, 379-392,  
666 doi:10.1016/j.geoderma.2009.08.023, 2009.  
667

668 Knorr, K.-H. and Blodau, C.: Impact of experimental drought and rewetting on redox  
669 transformations and methanogenesis in mesocosms of a northern fen soil, *Soil Biology and*  
670 *Biochemistry*, 1187-1198, doi:10.1016/j.soilbio.2009.02.030, 2009.  
671

672 Koch, M., Koebisch, F., Hahn, J., and Jurasinski, G.: From meadow to shallow lake: Monitoring  
673 secondary succession in a coastal fen after rewetting by flooding based on aerial imagery and plot  
674 data, *Mires and Peat*, 19(11), 1-17, doi:10.19189/MaP.2015.OMB.188, 2017.  
675

676 Koebisch, F., Glatzel, S., and Jurasinski, G.: Vegetation controls emissions in a coastal brackish  
677 fen, *Wetlands Ecology and Management*, 21(5), 323-337, doi:10.1007/s11273-013-9304-8, 2013.  
678

679 Kolb, S., Knief, C., Stubner, S., and Conrad, R.: Quantitative detection of methanotrophs in soil  
680 by novel *pmoA*-targeted real-time PCR assays, *Applied and Environmental Microbiology*, 69,  
681 2423-2429, doi:10.1128/AEM.69.5.2423-2429.2003, 2003.  
682

683 Komulainen, V.-M., Nykanen, H., Martikainen, P. J., and Laine, J.: Short-term effect of restoration  
684 on vegetation change and methane emissions from peatlands drained for forestry in southern  
685 Finland, *Canadian Journal of Forest Research*, 28, 402-411, doi:10.1139/x98-011, 1998.  
686

687 Kowalski, N., Dellwig, O., Beck, M., Grunwald, M., Dürselen, C-D., Badewien, T. H., Brumsack,  
688 H.-J., van Beusekom, J. E. E., and Böttcher, M. E.: A comparative study of manganese dynamics  
689 in the water column and sediments of intertidal systems of the North Sea, *Estuarine, Coastal and*  
690 *Shelf Science*, 100, 3-17, doi:10.1016/j.ecss.2011.03.011, 2012.  
691

692 Le Mer, J. and Roger. P.: Production, oxidation, emission, and consumption of methane by soils:  
693 a review, *European Journal of Soil Biology*, 37, 25-50, doi:10.1016/S1164-5563(01)01067-6,  
694 2001.  
695

696 Liebner, S., Schwarzenbach, S. P., and Zeyer, J.: Methane emissions from an alpine fen in central  
697 Switzerland, *Biogeochemistry*, 109, 287-299, doi:10.1007/s10533-011-9629-4, 2012.  
698



699 Liebner, S., Ganzert, L., Kiss, A., Yang, S., Wagner, D., and Svenning, M. M.: Shifts in  
700 methanogenic community composition and methane fluxes along the degradation of discontinuous  
701 permafrost, *Frontiers in Microbiology*, 6(356), 1-10, doi:10.3389/fmicb.2015.00356, 2015.  
702

703 Liu, D. Y., Ding, W. X., Jia, Z. J., and Cai, Z. C.: Relation between methanogenic archaea and  
704 methane production potential in selected and natural wetland ecosystems across China,  
705 *Biogeosciences*, 8, 329-338, doi:10.5194/bg-8-329-2011, 2011.  
706

707 Martin, M.: Cutadapt removes adapter sequences from high-throughput sequencing reads.  
708 *EMBnet. Journal*, 17(1), 10-12, doi:10.14806/ej.17.1.200, 2011.  
709

710 McDonald, D., Price, M. N., Goodrich, J., Nawrocki, E. P., DeSantis, T. Z., Probst, A., Andersen,  
711 G. L., Knight, R., and Hugenholtz, P.: An improved Greengenes taxonomy with explicit ranks for  
712 ecological and evolutionary analyses of bacteria and archaea, *ISME J*, 6(3), 610-618,  
713 doi:10.1038%2Fismej.2011.139, 2012.  
714

715 Megonigal, J. P., Mines, M. E., and Visscher, P. T.: Anaerobic metabolism: linkages to trace gases  
716 and aerobic processes, In: Schlesinger, W.H. (ed.), *Biogeochemistry*, Elsevier, Oxford, UK, pp.  
717 350-362, 2005.  
718

719 Minke, M., Augustin, J., Burlo, A., Yarmashuk, T., Chuvashova, H., Thiele, A., Freibauer, A.,  
720 Tikhonov, V., and Hoffman, M.: Water level, vegetation composition, and plant productivity  
721 explain greenhouse gas fluxes in temperate cutover fens after inundation, *Biogeosciences*, 13,  
722 3945-3970. doi:10.5194/bg-13-3945-2016, 2016.  
723

724 Myhre, G., Shindell, D., Breon, F.-M., Collins, W., Fuglestedt, J., Huang, J., Koch, D., Lamarque,  
725 J.-F., Lee, D., Mendoza, B., Nakajima, T., Robock, A., Rotstayn, L., Stephens, G., and Zhang, H.:  
726 Anthropogenic and natural radiative forcing. Chapter 8. In: Stocker, T. F., Qin, D., Plattner, G.-  
727 K., Tignor, M., Allen, D., Boschung, J., Nauels, A., Xia, Y., Bex, V., and Midgley, P. M. (eds.),  
728 *Climate Change 2013. The Physical Science Basis. Contribution of Working Group I to the Fifth*  
729 *Assessment Report of the Intergovernmental Panel on Climate Change.*, Cambridge University  
730 Press, Cambridge, UK and New York, USA, pp. 659–740, 2013.  
731

732 Narrowe, A. B., Angle, J. C., Daly, R. A., Stefanik, K. C., Wrighton, K. C., and Miller, C. S.:  
733 High-resolution sequencing reveals unexplored archaeal diversity in freshwater wetland soils,  
734 *Environmental Microbiology*, 19(6), 2192-2209, doi: 10.1111/1462-2920.13703, 2017.  
735

736 Oksanen, J., Blanchet, F. G., Friendly, M., Kindt, R., Legendre, P., McGlenn, D., Minchin, P. R.,  
737 O'Hara, R. B., Simpson, G. L., Solymos, Stevens, M. H. H., Szoecs, E., and Wagner, H.: *vegan:*

738 Community Ecology Package. R package version 2.4-5. [https://CRAN.R-](https://CRAN.R-project.org/package=vegan)  
739 [project.org/package=vegan](https://CRAN.R-project.org/package=vegan), 2017.  
740  
741 Quast, C., Pruesse, E., Yilmaz, P., Gerken, J., Schweer, T., Yarza, P., Peplies, J., and Glöckner,  
742 F.O.: The SILVA ribosomal RNA gene database project: improved data processing and web-based  
743 tools, *Nucleic Acids Research*, 41, D590-596, doi:10.1093/nar/gks1219., 2013.  
744  
745 Raghoebarsing, A. A., Pol, A., van de Pas-Schoonen, K. T., Smolders, A. J. P., Ettwig, K. F.,  
746 Rijpstra, W. I. C., Schouten, S., Damste, J. S. S., Op den Camp, H. J. M., Jetten, M. S. M., and  
747 Strous, M.: A microbial consortium couples anaerobic methane oxidation to denitrification,  
748 *Nature*, 440, 918–921, doi:10.1038/nature04617, 2006.  
749  
750 R Core Team: R: A language and environment for statistical computing. R Foundation for  
751 Statistical Computing, Vienna, Austria, <https://www.R-project.org/>, 2017.  
752  
753 Schönfeld-Bockholt, R., Roth, D., and Dittmann, L. Friends of the natural history in Mecklenburg.  
754 Ch. Teilflächenbezogene ökologische und futterwirtschaftliche Beurteilung des Grünlandes im  
755 Naturschutzgebiet Heiligensee und Hütelmoor, 2005.  
756  
757 Segers, R.: Methane production and methane consumption: a review of processes underlying  
758 wetland methane fluxes, *Biogeochemistry*, 41, 23-51, doi:10.1023/A:1005929032764, 1998.  
759  
760 Steffenhagen, P., Zak, D., Schulz, K., Timmerman, T., and Zerbe, S.: Biomass and nutrient stock  
761 of submersed and floating macrophytes in shallow lakes formed by rewetting of degraded fens,  
762 *Hydrobiologia*, 692(1), 99-109, doi:10.1007/s10750-011-0833-y, 2012.  
763  
764 Steinberg, L. M. and Regan, J. M.: *mcrA*-targeted real-time quantitative PCR method to examine  
765 methanogen communities, *Applied and Environmental Microbiology*, 75, 4435-4442,  
766 doi:10.1128/AEM.02858-08, 2009.  
767  
768 Sun, C. L., Brauer, S. L., Cadillo-Quiroz, H., Zinder, S. H., and Yavitt, J. B.: Seasonal changes in  
769 methanogenesis and methanogenic community in three peatlands, New York State, *Frontiers in*  
770 *Microbiology*, 3(81), 1-8, doi:10.3389/fmicb.2012.00081, 2012.  
771  
772 Takai, K., and Horikoshi, K.: Rapid detection and quantification of members of the archaeal  
773 community by quantitative PCR using fluorogenic probes, *Applied and Environmental*  
774 *Microbiology*, 66, 5066-5072, 2000.  
775

776 Tuittila, E.-S., Komulainen, V. M., Vasander, H., Nykänen, H., Martikainen, P. J., and Laine, J.:  
777 Methane dynamics of a restored cut-away peatland, *Global Change Biology*, 6, 569–581,  
778 doi:10.1046/j.1365-2486.2000.00341.x, 2000.  
779  
780 Urbanová, Z., Picek, T., and Bárta, J.: Effect of re-wetting on carbon and nutrient fluxes,  
781 greenhouse gas production, and diversity of methanogenic archaeal community, *Ecological*  
782 *Engineering*, 37, 1017-1026, doi:10.1016/j.ecoleng.2010.07.012, 2011.  
783  
784 Urbanová, Z., Bárta, J., and Picek, T.: Methane emissions and methanogenic archaea on pristine,  
785 drained and restored mountain peatlands, central Europe, *Ecosystems*, 16(4), 664–677,  
786 doi:10.1007/s10021-013-9637-4, 2013.  
787  
788 Vanselow-Algan, M., Schmidt, S. R., Greven, M., Fiencke, C., Kutzbach, L., and Pfeiffer, E.-M.:  
789 High methane emissions dominated annual greenhouse gas balances 30 years after bog rewetting,  
790 *Biogeosciences*, 12, 4361-4371, doi:10.5194/bg-12-4361-2015, 2015.  
791  
792 Voigtländer, U., Schmidt, J., and Scheller, W.: *Pflege-und Entwicklungsplan NSG Heiligensee*  
793 *und Hütelmoor*, 1996.  
794  
795 Wagner, D.: Effect of varying soil water potentials on methanogenesis in aerated marshland soils,  
796 *Scientific Reports*, 7(14706), doi:10.1038/s41598-017-14980-y, 2017.  
797  
798 Weisner, E. and Schernewski, G.: Adaptation to climate change: a combined coastal protection  
799 and re-alignment scheme in a Baltic tourism region, *Journal of Coastal Research*, Special Issue 65,  
800 1963-1968, doi:10.2112/SI65-332.1, 2013.  
801  
802 Wickham, H.: *ggplot2: Elegant Graphics for Data Analysis*, Springer New York, 2009.  
803  
804 Wilhelm, E., Batino, R., and Wilcock, R. J.: Low-pressure solubility of gases in liquid water,  
805 *Chemical Reviews*, 77(2), 219-262, doi:10.1021/cr60306a003, 1977.  
806  
807 Wilson, D., Blain, D., Couwenburg, J., Evans, C. D., Murdiyarso, D., Page, S. E., Renou-Wilson,  
808 F., Rieley, J. O., Sirin, A., Strack, M., and Tuittila, E.-S.: Greenhouse gas emission factors  
809 associated with rewetting of organic soils, *Mires and Peat*, 17(4), 1-28,  
810 doi:10.19189/MaP.2016.OMB.222, 2016.  
811  
812 Yrjälä, K., Tuomivirta, T. T., Juottonen, H., Putkinen, A., Lappi, K., Tuittila, E.-S., Penttilä, T.,  
813 Minkkinen, K., Laines, J., Peltoniemi, K., and Fritze, H.: CH<sub>4</sub> production and oxidation processes

814 in a boreal fen ecosystem after long-term water table drawdown, *Global Change Biology*, 17,  
815 1311-1320, doi:10.1111/j.1365-2486.2010.02290.x, 2011.

816

817 Zak, D. and Gelbrecht, J.: The mobilisation of phosphorus, organic carbon, and ammonium in the  
818 initial stage of fen rewetting (a case study from NE Germany), *Biogeochemistry*, 85, 141-151,  
819 doi:10.1007/s10533-007-9122-2, 2007.

820

821 Zak, D., Reuter, H., Augustin, J., Shatwell, T., Barth, M., Gelbrecht, J., and McInnes, R. J.:  
822 Changes of the CO<sub>2</sub> and CH<sub>4</sub> production potential of rewetted fens in the perspective of temporal  
823 vegetation shifts, *Biogeosciences*, 12, 2455-2468, doi:10.5194/bg-12-2455-2015, 2015.

824

825 Zhang, G., Haiyang, Y., Xianfang, F., Jing, M., and Hua, X.: Carbon isotope fractionation reveals  
826 distinct process of CH<sub>4</sub> emission from different compartments of paddy ecosystem, *Scientific*  
827 *Reports*, 6(27065), doi:10.1038/srep27065, 2016.

828

829 Zhang, J., Kobert, K., Flouri, T., and Stamatakis, A.: PEAR: a fast and accurate Illumina Paired-  
830 End reAd merger, *Bioinformatics*, 30(5), 614-620, doi:10.1093/bioinformatics/btt593, 2014.

831

832 Zhou, X., Zhang, Z., Tian, L., Li, X., and Tian, C.: Microbial communities in peatlands along a  
833 chronosequence on the Sanjiang Plain, China, *Nature Scientific Reports*, 7(9567), 1-11,  
834 doi:10.1038/s41598-017-10436-5, 2017.

835

836

837

838

839

840

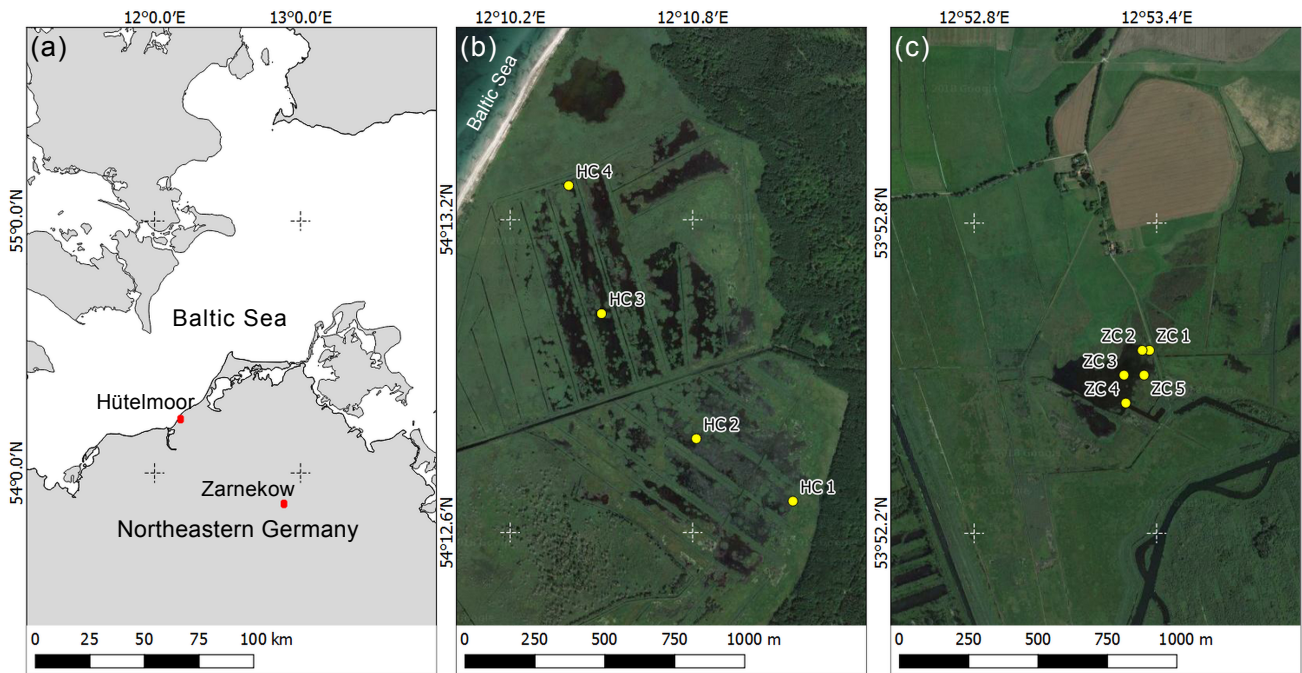

841

842 **Figure 1:** Location of study sites in northeastern Germany (a) and sampling locations within sites (b) Hütelmoor and (c) Zarnekow.  
843 Maps b) and c) are drawn to the same scale. Image source: (a) QGIS, (b) and (c) Google Earth via QGIS OpenLayer Plugin. Imagery  
844 date: August 9, 2015.

845

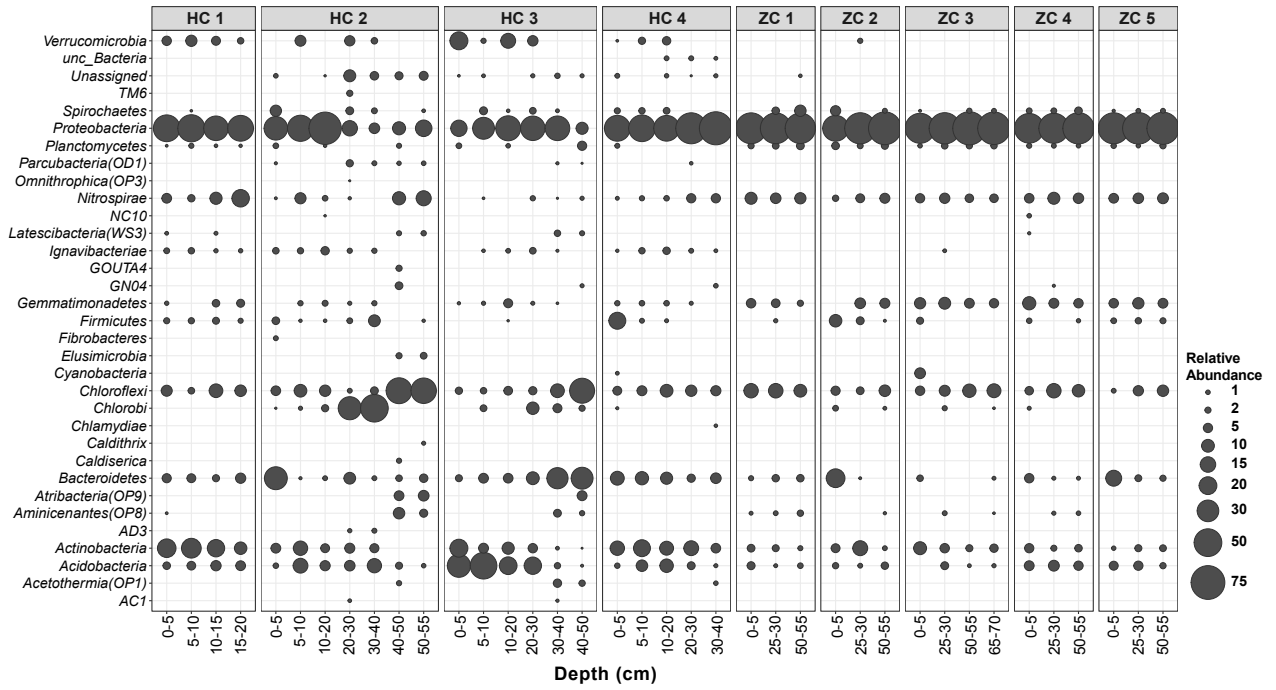

846  
 847 **Figure 2:** Relative abundances of different bacterial lineages in the study sites. Along the horizontal axis samples are arranged  
 848 according to site and depth. The rank order along the vertical axis is shown for the phylum level.

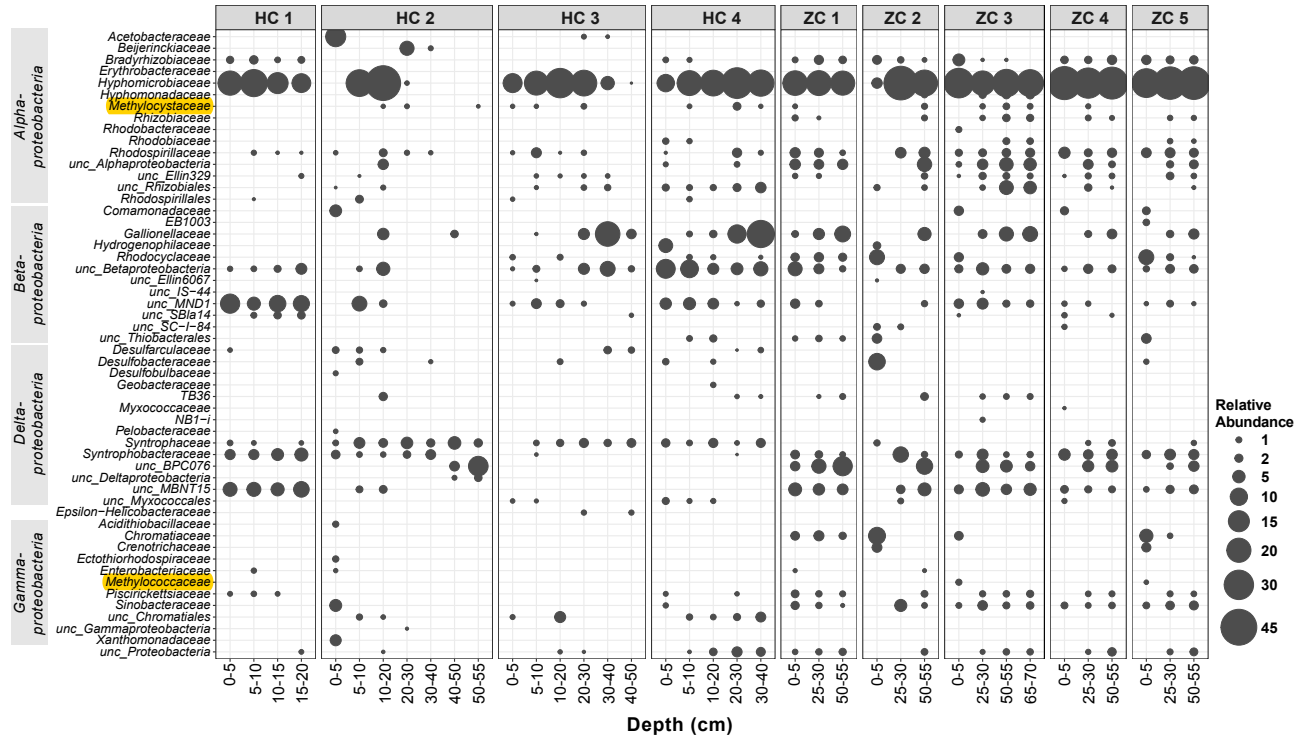

849  
 850 **Figure 3:** Relative abundances of Proteobacteria phyla in the study sites. Along the horizontal axis samples are arranged according  
 851 to site and depth. The rank order along the vertical axis is shown for the family level. If an assignment to the family level was not  
 852 possible the next higher assignable taxonomic level was used.  
 853

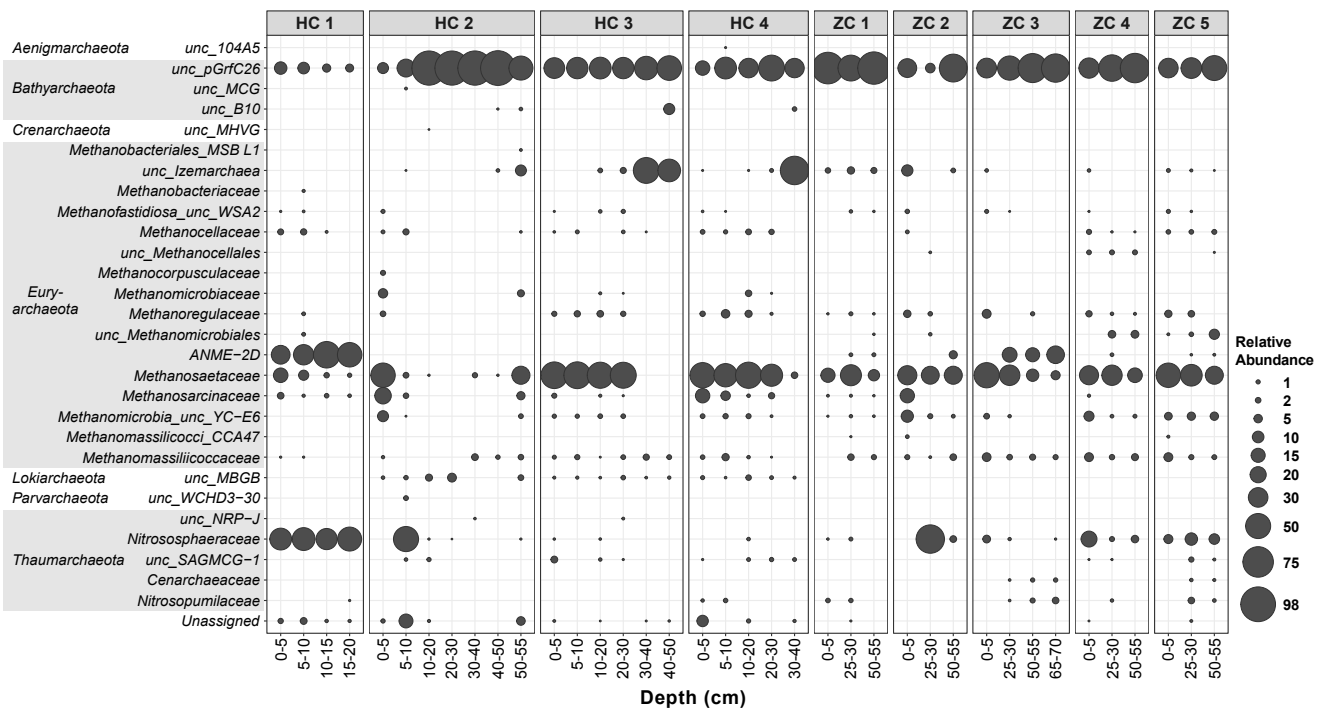

855  
856  
857  
858  
859  
860

**Figure 4:** Relative abundances of different archaeal lineages in the study sites. Along the horizontal axis samples are arranged according to site and depth. The rank order along the vertical axis is shown for the family level. If an assignment to the family level was not possible, the next higher assignable taxonomic level was used.



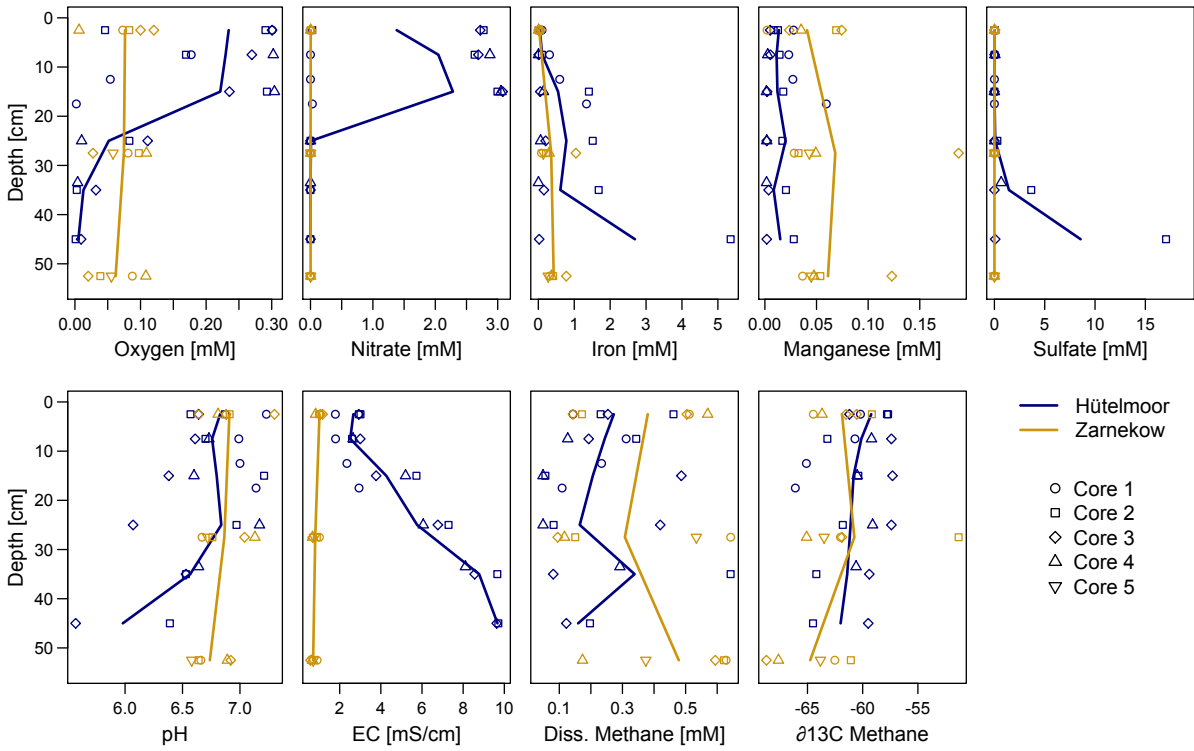

862  
863  
864  
865

**Figure 5:** Depth profiles of porewater geochemistry (see x-axis labels for considered variables) in both study sites. Lines connect the respective means.

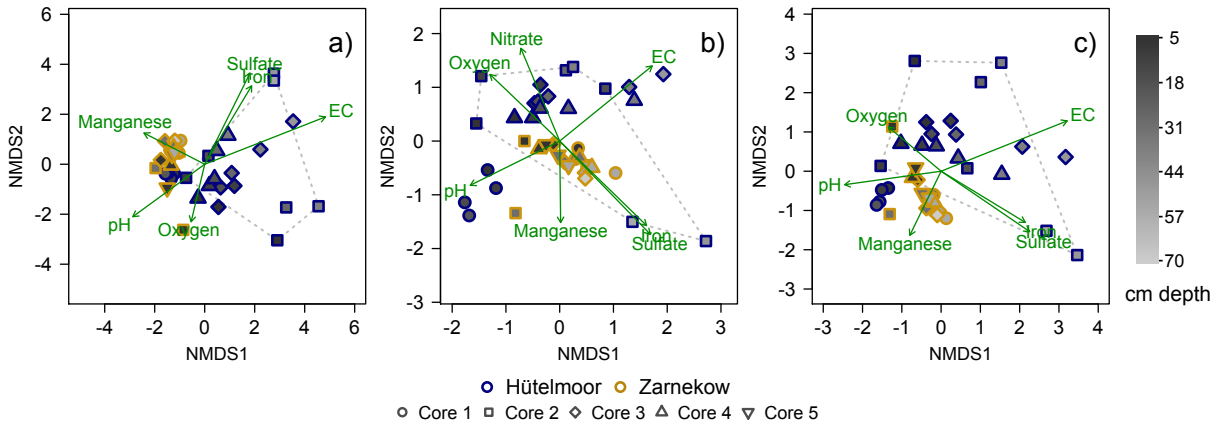

867  
 868 **Figure 6:** NMDS plots showing (a) bacterial, (b) archaeal, and (c) microbial (bacterial plus archaeal) community composition  
 869 across the nine peat cores and their respective depth sections. The point positions represent distinct microbial communities, with  
 870 the border colors of the symbols referring to the study sites and their shapes representing the core number. The shading indicates  
 871 sample depth, with darker shades representing shallower depths, and lighter shades representing deeper depths. The dashed grey  
 872 polygon highlights the large variation in microbial community composition in HC 2. Environmental fit vectors with a significance  
 873 of  $p < 0.05$  are shown in green.  
 874  
 875

876

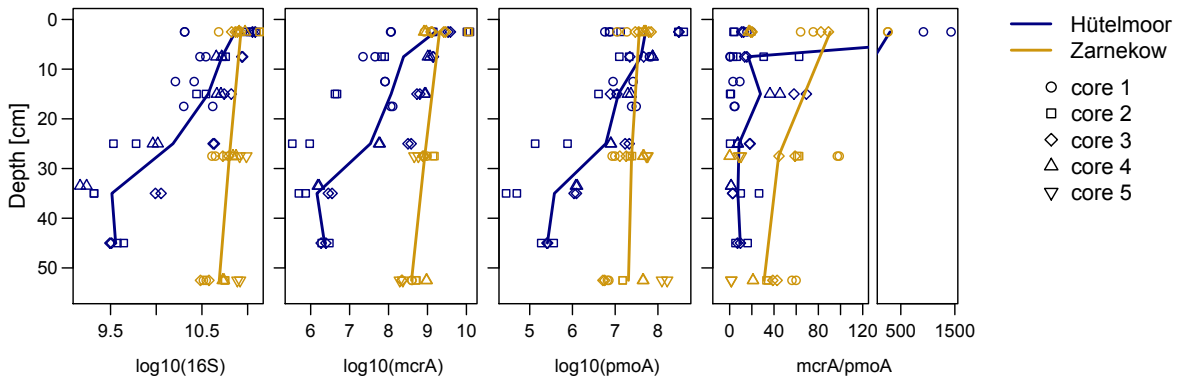

877  
878  
879  
880  
881  
882  
883

**Figure 7:** Depth distribution of qPCR abundances for total microbial (16S), methanogen (*mcrA*), methanotroph (*pmoA*), and ratio of *mcrA* to *pmoA* gene copy numbers in both sites. Microbial abundances were designated as numbers of gene copies per gram of dry peat soil and are shown against sampling depth using log-transformed values. Solid lines indicate mean abundances. Note that the plot at the right was split into two plots to capture very high *mcrA*/*pmoA* ratios in the upper peat layer.

884 **Table 1:** Environmental conditions, geochemical conditions, and microbial abundances in peat cores from the Hütelmoor, a coastal minerotrophic fen  
 885 in northeastern Germany. Environmental conditions are described by pH and EC (electrical conductivity). Geochemical parameters shown are dissolved  
 886 methane (CH<sub>4</sub>) concentrations, the isotopic signature of methane-bound carbon ( $\delta^{13}\text{C}$ -CH<sub>4</sub>), and concentrations of terminal electron acceptors which  
 887 are denoted with their respective chemical abbreviations. Microbial abundances here represent the mean value of averaged subsamples for each depth  
 888 section (n=2). nd = not detected.  
 889  
 890

| Core, depth      | pH  | EC                  | $\delta^{13}\text{C}$ -<br>CH <sub>4</sub> | Dissolved<br>CH <sub>4</sub> | O <sub>2</sub> | NO <sub>3</sub> <sup>-</sup> | Fe   | Mn   | SO <sub>4</sub> <sup>2-</sup> | 16S                    | <i>mcrA</i>                          | <i>pmoA</i>           | <i>mcrA/pmoA</i> |
|------------------|-----|---------------------|--------------------------------------------|------------------------------|----------------|------------------------------|------|------|-------------------------------|------------------------|--------------------------------------|-----------------------|------------------|
| cm               |     | mS cm <sup>-1</sup> |                                            |                              |                | mM                           |      |      |                               |                        | gene copies g dry peat <sup>-1</sup> |                       |                  |
| <b>HC 1, 0-5</b> | 7.2 | 1.79                | -60.2                                      | 0.14                         | 0.30           | nd                           | 0.10 | 0.03 | 0.03                          | 2.04x10 <sup>10</sup>  | 1.15x10 <sup>08</sup>                | 6.60x10 <sup>06</sup> | 17.7             |
| 5-10             | 7.0 | 1.80                | -60.7                                      | 0.31                         | 0.18           | nd                           | 0.31 | 0.02 | 0.01                          | 3.25 x10 <sup>10</sup> | 3.36x10 <sup>07</sup>                | 6.68x10 <sup>07</sup> | 0.51             |
| 10-15            | 7.0 | 2.35                | -65.1                                      | 0.23                         | 0.05           | nd                           | 0.60 | 0.03 | nd                            | 2.11x10 <sup>10</sup>  | 8.12x10 <sup>07</sup>                | 1.76x10 <sup>07</sup> | 6.12             |
| 15-20            | 7.1 | 2.94                | -66.1                                      | 0.11                         | nd             | 0.03                         | 1.34 | 0.06 | nd                            | 3.08x10 <sup>10</sup>  | 1.21x10 <sup>08</sup>                | 2.76x10 <sup>07</sup> | 4.41             |
| <b>HC 2, 0-5</b> | 6.9 | 3.01                | -57.8                                      | 0.46                         | 0.05           | 0.03                         | 0.03 | 0.01 | nd                            | 1.10x10 <sup>11</sup>  | 1.13x10 <sup>10</sup>                | 1.03x10 <sup>07</sup> | 1,170            |
| 5-10             | 6.7 | 2.60                | -63.2                                      | 0.34                         | 0.17           | 2.63                         | 0.10 | 0.01 | 0.01                          | 5.51x10 <sup>10</sup>  | 7.27x10 <sup>07</sup>                | 1.69x10 <sup>07</sup> | 4.73             |
| 10-20            | 7.2 | 5.73                | -60.4                                      | 0.06                         | 0.29           | 3.00                         | 1.41 | 0.02 | nd                            | 3.13x10 <sup>10</sup>  | 4.47x10 <sup>06</sup>                | 7.32x10 <sup>06</sup> | 0.74             |
| 20-30            | 7.0 | 7.29                | -61.8                                      | 0.08                         | 0.08           | nd                           | 1.51 | 0.02 | 0.29                          | 4.71x10 <sup>09</sup>  | 6.41x10 <sup>05</sup>                | 4.50x10 <sup>05</sup> | 3.75             |
| 30-40            | 6.5 | 9.66                | -64.2                                      | 0.64                         | nd             | nd                           | 1.68 | 0.02 | 3.66                          | 2.09x10 <sup>09</sup>  | 6.21x10 <sup>05</sup>                | 3.90x10 <sup>04</sup> | 18.3             |
| 40-50            | 6.4 | 9.71                | -64.5                                      | 0.20                         | nd             | nd                           | 5.35 | 0.03 | 17.1                          | 4.09x10 <sup>09</sup>  | 2.47x10 <sup>06</sup>                | 2.75x10 <sup>05</sup> | 10.7             |
| <b>HC 3, 0-5</b> | 6.6 | 2.93                | -57.7                                      | 0.23                         | 0.29           | 2.77                         | 0.11 | 0.01 | 0.04                          | 1.10x10 <sup>11</sup>  | 1.34x10 <sup>09</sup>                | 3.51x10 <sup>08</sup> | 3.86             |
| 5-10             | 6.6 | 3.00                | -57.4                                      | 0.19                         | 0.27           | 2.69                         | 0.01 | 0.01 | 0.03                          | 8.72x10 <sup>10</sup>  | 1.40x10 <sup>09</sup>                | 3.42x10 <sup>07</sup> | 46.6             |
| 10-20            | 6.4 | 3.77                | -57.3                                      | 0.49                         | 0.24           | 3.08                         | 0.05 | nd   | nd                            | 6.08x10 <sup>10</sup>  | 5.86x10 <sup>08</sup>                | 9.35x10 <sup>06</sup> | 63.6             |
| 20-30            | 6.1 | 6.77                | -57.4                                      | 0.42                         | 0.11           | nd                           | 0.20 | nd   | nd                            | 4.26x10 <sup>10</sup>  | 3.48x10 <sup>08</sup>                | 1.92x10 <sup>07</sup> | 18.2             |
| 30-40            | 6.5 | 8.56                | -59.4                                      | 0.08                         | 0.03           | nd                           | 0.16 | nd   | nd                            | 1.05x10 <sup>10</sup>  | 3.20x10 <sup>06</sup>                | 1.17x10 <sup>06</sup> | 2.74             |
| 40-50            | 5.6 | 9.36                | -59.5                                      | 0.12                         | 0.01           | nd                           | 0.02 | nd   | 0.08                          | 3.18x10 <sup>09</sup>  | 2.16x10 <sup>06</sup>                | 2.58x10 <sup>05</sup> | 8.39             |
| <b>HC 4, 0-5</b> | 6.6 | 2.93                | -61.2                                      | 0.25                         | 0.30           | 2.72                         | 0.02 | 0.01 | 0.04                          | 1.17x10 <sup>11</sup>  | 3.63x10 <sup>09</sup>                | 3.09x10 <sup>08</sup> | 11.7             |
| 5-10             | 6.7 | 2.65                | -59.2                                      | 0.13                         | 0.30           | 2.87                         | 0.01 | nd   | 0.05                          | 4.87x10 <sup>10</sup>  | 1.09x10 <sup>09</sup>                | 7.51x10 <sup>07</sup> | 14.5             |
| 10-20            | 6.6 | 5.20                | -60.5                                      | 0.05                         | 0.30           | 3.05                         | 0.14 | nd   | nd                            | 4.85x10 <sup>10</sup>  | 8.71x10 <sup>08</sup>                | 2.15x10 <sup>07</sup> | 40.8             |
| 20-30            | 7.2 | 6.06                | -59.1                                      | 0.05                         | 0.01           | nd                           | 0.06 | nd   | 0.02                          | 9.78x10 <sup>09</sup>  | 5.82x10 <sup>07</sup>                | 7.91x10 <sup>06</sup> | 7.36             |
| 30-40            | 6.6 | 8.11                | -60.6                                      | 0.29                         | nd             | nd                           | 0.09 | nd   | 0.67                          | 1.60x10 <sup>09</sup>  | 1.58x10 <sup>06</sup>                | 1.25x10 <sup>06</sup> | 1.27             |

891 **Table 2:** Environmental conditions, geochemical conditions, and microbial abundances in peat cores from Zarnekow, a freshwater minerotrophic fen  
 892 in northeastern Germany. Environmental conditions are described by pH and EC (electrical conductivity). Geochemical parameters shown are dissolved  
 893 methane (CH<sub>4</sub>) concentrations, the isotopic signature of methane-bound carbon ( $\delta^{13}\text{C}$ -CH<sub>4</sub>), and concentrations of terminal electron acceptors which  
 894 are denoted with their respective chemical abbreviations. Microbial abundances here represent the mean value of averaged subsamples for each depth  
 895 section (n=2). nd = not detected.  
 896  
 897

| Core, depth      | pH   | EC                  | $\delta^{13}\text{C}$ -<br>CH <sub>4</sub> | Dissolved<br>CH <sub>4</sub> | O <sub>2</sub> | NO <sub>3</sub> <sup>-</sup> | Fe    | Mn    | SO <sub>4</sub> <sup>2-</sup> | 16S                   | <i>mcrA</i>                          | <i>pmoA</i>           | <i>mcrA/pmoA</i> |
|------------------|------|---------------------|--------------------------------------------|------------------------------|----------------|------------------------------|-------|-------|-------------------------------|-----------------------|--------------------------------------|-----------------------|------------------|
| cm               |      | mS cm <sup>-1</sup> |                                            |                              |                | mM                           |       |       |                               |                       | gene copies g dry peat <sup>-1</sup> |                       |                  |
| <b>ZC 1, 0-5</b> | 6.64 | 1.03                | -64.5                                      | 0.51                         | 0.07           | 0.001                        | 0.007 | 0.002 | 0.002                         | 6.33x10 <sup>10</sup> | 1.02x10 <sup>09</sup>                | 1.49x10 <sup>07</sup> | 69.7             |
| 25-30            | 6.67 | 1.14                | -62.0                                      | 0.64                         | 0.08           | 0.001                        | 0.087 | 0.028 | 0.003                         | 4.25x10 <sup>10</sup> | 8.96x10 <sup>08</sup>                | 9.14x10 <sup>06</sup> | 98.0             |
| 50-55            | 6.66 | 1.31                | -62.5                                      | 0.63                         | 0.09           | 0.005                        | 0.310 | 0.037 | 0.002                         | 3.40x10 <sup>10</sup> | 3.97x10 <sup>08</sup>                | 6.85x10 <sup>06</sup> | 58.1             |
| <b>ZC 2, 0-5</b> | 6.91 | 1.00                | -59.2                                      | 0.17                         | 0.08           | 0.004                        | 0.012 | 0.069 | 0.007                         | 1.43x10 <sup>11</sup> | 1.14x10 <sup>10</sup>                | 4.35x10 <sup>07</sup> | 261              |
| 25-30            | 6.76 | 1.29                | -51.3                                      | 0.15                         | 0.10           | 0.001                        | 0.215 | 0.033 | 0.013                         | 6.44x10 <sup>10</sup> | 1.45x10 <sup>09</sup>                | 2.34x10 <sup>07</sup> | 61.8             |
| 50-55            | 6.64 | 1.52                | -61.1                                      | 0.62                         | 0.04           | nd                           | 0.410 | 0.054 | 0.003                         | 5.64x10 <sup>10</sup> | 5.10x10 <sup>08</sup>                | 1.50x10 <sup>07</sup> | 34.0             |
| <b>ZC 3, 0-5</b> | 6.88 | 1.17                | -60.5                                      | 0.50                         | 0.10           | 0.001                        | 0.073 | 0.074 | 0.032                         | 7.86x10 <sup>10</sup> | 2.78x10 <sup>09</sup>                | 3.26x10 <sup>07</sup> | 85.7             |
| 25-30            | 7.04 | 3.39                | -61.9                                      | 0.10                         | 0.03           | 0.002                        | 1.046 | 0.188 | 0.003                         | 5.79x10 <sup>10</sup> | 7.81x10 <sup>08</sup>                | 1.55x10 <sup>07</sup> | 51.8             |
| 50-55            | 6.92 | 3.82                | -68.7                                      | 0.59                         | 0.02           | nd                           | 0.779 | 0.123 | 0.003                         | 3.41x10 <sup>10</sup> | 2.21x10 <sup>08</sup>                | 5.41x10 <sup>06</sup> | 40.9             |
| <b>ZC 4, 0-5</b> | 7.3  | 1.06                | -61.5                                      | 0.14                         | 0.12           | 0.010                        | 0.013 | 0.024 | 0.035                         | 7.19x10 <sup>10</sup> | 1.28x10 <sup>09</sup>                | 6.53x10 <sup>07</sup> | 19.6             |
| 25-30            | 7.13 | 1.58                | -65.1                                      | 0.12                         | 0.11           | 0.002                        | 0.301 | 0.049 | 0.002                         | 7.19x10 <sup>10</sup> | nd                                   | 4.60x10 <sup>07</sup> | -                |
| 50-55            | 6.89 | 1.51                | -67.6                                      | 0.17                         | 0.11           | 0.002                        | 0.366 | 0.048 | 0.002                         | 5.42x10 <sup>10</sup> | 9.47x10 <sup>08</sup>                | 4.50x10 <sup>07</sup> | 21.0             |
| <b>ZC 5, 0-5</b> | 6.81 | 0.83                | -63.7                                      | 0.57                         | 0.01           | 0.002                        | 0.005 | 0.035 | 0.005                         | 8.73x10 <sup>10</sup> | 8.73x10 <sup>08</sup>                | 4.97x10 <sup>07</sup> | 17.6             |
| 25-30            | 6.72 | 0.86                | -63.5                                      | 0.53                         | 0.06           | 0.002                        | 0.139 | 0.043 | 0.001                         | 8.94x10 <sup>10</sup> | 5.21x10 <sup>08</sup>                | 5.57x10 <sup>07</sup> | 93.4             |
| 50-55            | 6.58 | 1.00                | -63.8                                      | 0.37                         | 0.06           | 0.002                        | 0.275 | 0.045 | 0.002                         | 8.00x10 <sup>10</sup> | 2.14x10 <sup>08</sup>                | 1.44x10 <sup>08</sup> | 14.9             |

898
